# Supplementary material
Source: PubMed Central journal article supplement (PMC7255694)
Supplement: NIHMS1583519-supplement-suppl2.pdf [file NIHMS1583519-supplement-suppl2.pdf]

**Supplemental Table 1:** The genes correlated with the sensitivity of a panel of 28 cell lines to IGF1R inhibitor BMS-536924 as identified by Affymetrix gene array. The genes were selected by two statistic analyses: two sample t-test to compare gene expression of 16 sensitive cell lines to that of 12 resistant cell lines ( $p < 0.001$  and 2 fold); and the Pearson correlations between the  $\log_2(\text{IC}_{50})$  data and the expression level of each gene in the 28 cell lines ( $p < 0.001$ ). The genes overlapped from the two analyses are listed here with p values and fold change between the sensitive and resistant cell line groups indicated. The genes are rank ordered by the fold changes. The positive fold changes indicate the genes having higher expression level in the sensitive cell lines and the negative fold changes indicate the genes having higher expression level in the resistant cell lines.

| Probe ID                                                           | Accession # | Gene Title                                                                                        | Gene Symbol       | p-value in t-test | Fold (S/R) <sup>1</sup> | p-value (correlation) <sup>2</sup> |
|--------------------------------------------------------------------|-------------|---------------------------------------------------------------------------------------------------|-------------------|-------------------|-------------------------|------------------------------------|
| <b>Genes higher expressed in the group of sensitive cell lines</b> |             |                                                                                                   |                   |                   |                         |                                    |
| 214451_at                                                          | NM_003221   | transcription factor AP-2 beta (activating enhancer binding protein 2 beta)                       | TFAP2B            | 1.3E-05           | 56.6                    | 4.3E-04                            |
| 212713_at                                                          | R72286      | microfibrillar-associated protein 4                                                               | MFAP4             | 1.7E-06           | 14.5                    | 9.9E-05                            |
| 204915_s_at                                                        | AB028641    | SRY (sex determining region Y)-box 11                                                             | SOX11             | 1.7E-07           | 13.4                    | 4.3E-05                            |
| 216623_x_at                                                        | AK025084    | trinucleotide repeat containing 9                                                                 | TNRC9             | 3.2E-04           | 13.2                    | 5.5E-04                            |
| 221011_s_at                                                        | NM_030915   | limb bud and heart development homolog (mouse) /// limb bud and heart development homolog (mouse) | LBH               | 7.1E-05           | 12.2                    | 4.7E-04                            |
| 202517_at                                                          | NM_001313   | collapsin response mediator protein 1                                                             | CRMP1             | 3.0E-06           | 11.3                    | 4.1E-04                            |
| 205888_s_at                                                        | A1962693    | janus kinase and microtubule interacting protein 2 /// myelin transcription factor 1-like         | JAKMIP2 /// MYT1L | 3.1E-08           | 9.3                     | 1.1E-05                            |
| 207781_s_at                                                        | NM_021998   | zinc finger protein 711                                                                           | ZNF711            | 9.2E-12           | 8.1                     | 3.6E-07                            |
| 221748_s_at                                                        | AL046979    | tensin 1 /// tensin 1                                                                             | TNS1              | 5.4E-05           | 7.8                     | 4.3E-04                            |
| 213170_at                                                          | AA406605    | glutathione peroxidase 7                                                                          | GPX7              | 2.0E-05           | 7.4                     | 1.6E-04                            |
| 205123_s_at                                                        | NM_003692   | transmembrane protein with EGF-like and two follistatin-like domains 1                            | TMEFF1            | 1.2E-05           | 6.9                     | 1.0E-04                            |
| 203999_at                                                          | AV731490    | ---                                                                                               | ---               | 1.6E-06           | 6.7                     | 9.2E-04                            |

|             |           |                                                                                                                                                                                                     |                    |         |     |         |
|-------------|-----------|-----------------------------------------------------------------------------------------------------------------------------------------------------------------------------------------------------|--------------------|---------|-----|---------|
| 218445_at   | NM_018649 | H2A histone family, member Y2                                                                                                                                                                       | H2AFY2             | 1.2E-07 | 6.3 | 9.7E-05 |
| 215043_s_at | X83301    | SMA3 /// SMA5                                                                                                                                                                                       | SMA3 /// SMA5      | 4.0E-07 | 6.2 | 1.5E-05 |
| 209598_at   | AB020690  | paraneoplastic antigen MA2                                                                                                                                                                          | PNMA2              | 2.5E-05 | 6.1 | 1.4E-04 |
| 212382_at   | BF433429  | Transcription factor 4                                                                                                                                                                              | TCF4               | 1.3E-06 | 5.8 | 1.0E-04 |
| 212386_at   | BF592782  | CDNA FLJ11918 fis, clone HEMBB1000272                                                                                                                                                               | ---                | 1.6E-06 | 5.7 | 6.0E-06 |
| 205889_s_at | NM_014790 | janus kinase and microtubule interacting protein 2                                                                                                                                                  | JAKMIP2            | 9.6E-08 | 5.5 | 4.5E-06 |
| 205830_at   | NM_004362 | calmegin                                                                                                                                                                                            | CLGN               | 5.6E-08 | 5.4 | 4.4E-07 |
| 211071_s_at | BC006471  | myeloid/lymphoid or mixed-lineage leukemia (trithorax homolog, Drosophila); translocated to, 11 /// myeloid/lymphoid or mixed-lineage leukemia (trithorax homolog, Drosophila); translocated to, 11 | MLLT11             | 1.9E-05 | 5.3 | 5.7E-04 |
| 212599_at   | AK025298  | autism susceptibility candidate 2                                                                                                                                                                   | AUTS2              | 2.1E-05 | 5.3 | 1.8E-05 |
| 206440_at   | NM_004664 | lin-7 homolog A (C. elegans)                                                                                                                                                                        | LIN7A              | 9.1E-04 | 4.8 | 3.2E-04 |
| 206565_x_at | NM_006780 | SMA3                                                                                                                                                                                                | SMA3               | 9.0E-07 | 4.7 | 4.6E-06 |
| 219855_at   | NM_018159 | nudix (nucleoside diphosphate linked moiety X)-type motif 11                                                                                                                                        | NUDT11             | 3.8E-04 | 4.7 | 8.1E-04 |
| 213131_at   | R38389    | olfactomedin 1                                                                                                                                                                                      | OLFM1              | 1.6E-04 | 4.7 | 6.0E-04 |
| 200884_at   | NM_001823 | creatine kinase, brain                                                                                                                                                                              | CKB                | 2.8E-07 | 4.6 | 9.8E-07 |
| 206655_s_at | NM_000407 | glycoprotein Ib (platelet), beta polypeptide /// septin 5                                                                                                                                           | GP1BB /// SEPT5    | 1.2E-05 | 4.5 | 9.1E-04 |
| 214023_x_at | AL533838  | tubulin, beta 2B                                                                                                                                                                                    | TUBB2B             | 5.4E-04 | 4.5 | 1.5E-04 |
| 204860_s_at | A1817801  | NLR family, apoptosis inhibitory protein /// similar to Baculoviral IAP repeat-containing protein 1 (Neuronal apoptosis inhibitory protein)                                                         | NAIP /// LOC728519 | 3.0E-05 | 4.2 | 1.1E-04 |
| 208998_at   | U94592    | uncoupling protein 2 (mitochondrial, proton carrier)                                                                                                                                                | UCP2               | 2.6E-06 | 4.2 | 6.1E-06 |
| 204165_at   | NM_003931 | WAS protein family, member 1                                                                                                                                                                        | WASF1              | 2.7E-07 | 4.1 | 1.1E-05 |

|             |           |                                                               |                    |         |     |         |
|-------------|-----------|---------------------------------------------------------------|--------------------|---------|-----|---------|
| 212847_at   | AL036840  | Far upstream element (FUSE) binding protein 1                 | FUBP1              | 1.0E-07 | 4.1 | 1.2E-04 |
| 213216_at   | AL537463  | OTU domain containing 3                                       | OTUD3              | 9.8E-06 | 3.9 | 1.9E-05 |
| 213547_at   | AB014567  | cullin-associated and neddylation-dissociated 2 (putative)    | CAND2              | 3.3E-05 | 3.7 | 2.1E-05 |
| 204742_s_at | NM_015032 | androgen-induced proliferation inhibitor                      | APRIN              | 8.9E-06 | 3.5 | 1.5E-05 |
| 213605_s_at | AL049987  | Similar to Beta-glucuronidase precursor                       | LOC728411          | 1.6E-05 | 3.5 | 3.5E-05 |
| 204457_s_at | NM_002048 | growth arrest-specific 1                                      | GAS1               | 1.4E-04 | 3.4 | 1.1E-04 |
| 214102_at   | AK023737  | centaurin, delta 1                                            | CENTD1             | 1.9E-06 | 3.4 | 5.6E-06 |
| 201449_at   | AL567227  | TIA1 cytotoxic granule-associated RNA binding protein         | TIA1               | 1.3E-08 | 3.4 | 2.4E-05 |
| 205347_s_at | NM_021992 | thymosin-like 8                                               | TMSL8              | 7.6E-05 | 3.3 | 1.2E-04 |
| 212816_s_at | BE613178  | cystathionine-beta-synthase                                   | CBS                | 5.8E-05 | 3.2 | 5.6E-04 |
| 214850_at   | X75940    | glucuronidase, beta pseudogene 1                              | GUSBP1             | 4.9E-06 | 3.2 | 1.4E-04 |
| 212731_at   | U79297    | ankyrin repeat domain 46                                      | ANKRD46            | 1.8E-07 | 3.2 | 2.2E-06 |
| 221965_at   | AI990326  | M-phase phosphoprotein 9                                      | MPHOSPH9           | 1.6E-07 | 3.1 | 8.2E-06 |
| 213283_s_at | BG285616  | sal-like 2 (Drosophila)                                       | SALL2              | 2.7E-06 | 3.1 | 2.4E-05 |
| 200644_at   | NM_023009 | MARCKS-like 1                                                 | MARCKSL1           | 2.8E-05 | 3.1 | 1.8E-05 |
| 210882_s_at | U04811    | trophinin                                                     | TRO                | 2.2E-05 | 3.0 | 4.4E-05 |
| 204040_at   | NM_014746 | ring finger protein 144                                       | RNF144             | 1.8E-04 | 3.0 | 1.9E-04 |
| 203069_at   | NM_014849 | synaptic vesicle glycoprotein 2A                              | SV2A               | 3.1E-04 | 3.0 | 8.0E-04 |
| 215146_s_at | AB028966  | tetratricopeptide repeat domain 28                            | TTC28              | 7.9E-07 | 3.0 | 1.4E-08 |
| 213610_s_at | BE326381  | kelch-like 23 (Drosophila)                                    | KLHL23             | 7.0E-06 | 2.9 | 5.1E-05 |
| 202967_at   | NM_001512 | glutathione S-transferase A4                                  | GSTA4              | 1.2E-04 | 2.9 | 3.1E-04 |
| 218223_s_at | NM_016274 | pleckstrin homology domain containing, family O member 1      | PLEKHO1            | 5.9E-07 | 2.9 | 1.2E-07 |
| 221261_x_at | NM_030801 | melanoma antigen family D, 4 /// melanoma antigen family D, 4 | MAGED4             | 1.9E-05 | 2.9 | 9.3E-06 |
| 212624_s_at | BF339445  | chimerin (chimaerin) 1                                        | CHN1               | 9.7E-05 | 2.9 | 1.5E-04 |
| 215599_at   | X83300    | SMA4 /// similar to SMA4                                      | SMA4 /// LOC730390 | 9.8E-06 | 2.8 | 1.3E-04 |
| 212126_at   | BG391282  | CDNA clone IMAGE:4842353                                      | ---                | 1.4E-07 | 2.8 | 7.4E-05 |

|             |           |                                                                              |          |         |     |         |
|-------------|-----------|------------------------------------------------------------------------------|----------|---------|-----|---------|
| 209153_s at | M31523    | transcription factor 3 (E2A immunoglobulin enhancer binding factors E12/E47) | TCF3     | 1.4E-06 | 2.8 | 9.7E-05 |
| 214724_at   | AF070621  | DIX domain containing 1                                                      | DIXDC1   | 1.8E-05 | 2.7 | 2.8E-04 |
| 208986_at   | AL559478  | transcription factor 12 (HTF4, helix-loop-helix transcription factors 4)     | TCF12    | 2.3E-06 | 2.7 | 2.7E-07 |
| 213626_at   | AL049442  | carbonyl reductase 4                                                         | CBR4     | 9.6E-06 | 2.7 | 3.3E-04 |
| 218868_at   | NM_020445 | ARP3 actin-related protein 3 homolog B (yeast)                               | ACTR3B   | 6.8E-06 | 2.6 | 6.9E-04 |
| 203298_s at | NM_004973 | jumonji, AT rich interactive domain 2                                        | JARID2   | 1.3E-07 | 2.6 | 1.6E-04 |
| 37577_at    | U79256    | Rho GTPase activating protein 19                                             | ARHGAP19 | 4.1E-05 | 2.6 | 1.1E-04 |
| 212482_at   | BF671894  | required for meiotic nuclear division 5 homolog A (S. cerevisiae)            | RMND5A   | 1.8E-06 | 2.5 | 1.9E-04 |
| 204173_at   | NM_002475 | myosin, light chain 6B, alkali, smooth muscle and non-muscle                 | MYL6B    | 9.9E-04 | 2.5 | 7.4E-04 |
| 203151_at   | AW296788  | microtubule-associated protein 1A                                            | MAP1A    | 2.3E-04 | 2.5 | 7.7E-04 |
| 212919_at   | AV715578  | DCP2 decapping enzyme homolog (S. cerevisiae)                                | DCP2     | 1.1E-06 | 2.5 | 3.3E-05 |
| 213694_at   | AW027347  | round spermatid basic protein 1                                              | RSBN1    | 9.2E-07 | 2.5 | 2.8E-04 |
| 203625_x at | BG105365  | melanoma cell adhesion molecule                                              | MCAM     | 1.8E-04 | 2.5 | 1.4E-04 |
| 204795_at   | NM_025263 | proline rich 3                                                               | PRR3     | 1.0E-05 | 2.5 | 2.0E-04 |
| 212670_at   | AA479278  | elastin (supravalvular aortic stenosis, Williams-Beuren syndrome)            | ELN      | 2.0E-05 | 2.5 | 1.4E-04 |
| 212547_at   | N34842    | FLJ35348                                                                     | FLJ35348 | 9.4E-07 | 2.5 | 7.2E-05 |
| 210567_s at | BC001441  | S-phase kinase-associated protein 2 (p45)                                    | SKP2     | 6.7E-04 | 2.4 | 4.1E-04 |
| 209748_at   | AB029006  | spastin                                                                      | SPAST    | 4.0E-07 | 2.4 | 3.8E-04 |
| 215128_at   | AV704232  | CDNA FLJ11682 fis, clone HEMBA1004880                                        | ---      | 4.7E-05 | 2.4 | 4.5E-04 |
| 203825_at   | NM_007371 | bromodomain containing 3                                                     | BRD3     | 1.2E-06 | 2.4 | 4.5E-05 |
| 214220_s at | AW003635  | Alstrom syndrome 1                                                           | ALMS1    | 1.4E-06 | 2.4 | 1.6E-05 |
| 210045_at   | AU151428  | isocitrate dehydrogenase 2 (NADP+), mitochondrial                            | IDH2     | 6.1E-06 | 2.4 | 5.7E-04 |

|             |           |                                                                           |              |         |     |         |
|-------------|-----------|---------------------------------------------------------------------------|--------------|---------|-----|---------|
| 218683_at   | NM_021190 | polypyrimidine tract binding protein 2                                    | PTBP2        | 1.5E-06 | 2.4 | 5.8E-04 |
| 218457_s_at | NM_022552 | DNA (cytosine-5-)-methyltransferase 3 alpha                               | DNMT3A       | 2.2E-06 | 2.4 | 7.2E-05 |
| 204061_at   | NM_005044 | protein kinase, X-linked                                                  | PRKX         | 6.2E-06 | 2.4 | 2.3E-05 |
| 210649_s_at | AF231056  | AT rich interactive domain 1A (SWI-like)                                  | ARID1A       | 7.1E-07 | 2.4 | 7.2E-08 |
| 212153_at   | AB007930  | pogo transposable element with ZNF domain                                 | POGZ         | 8.7E-08 | 2.4 | 6.1E-05 |
| 218265_at   | NM_024077 | SECIS binding protein 2                                                   | SECISBP2     | 1.1E-06 | 2.4 | 2.2E-05 |
| 210543_s_at | U34994    | protein kinase, DNA-activated, catalytic polypeptide                      | PRKDC        | 5.0E-04 | 2.3 | 1.3E-04 |
| 220443_s_at | NM_012476 | ventral anterior homeobox 2                                               | VAX2         | 2.0E-04 | 2.3 | 5.1E-04 |
| 202561_at   | AF070613  | tankyrase, TRF1-interacting ankyrin-related ADP-ribose polymerase         | TNKS         | 1.4E-04 | 2.3 | 4.6E-04 |
| 203795_s_at | NM_020993 | B-cell CLL/lymphoma 7A                                                    | BCL7A        | 3.1E-06 | 2.3 | 3.3E-04 |
| 213387_at   | AB033066  | ATPase family, AAA domain containing 2B                                   | ATAD2B       | 2.5E-06 | 2.3 | 1.0E-04 |
| 203046_s_at | NM_003920 | timeless homolog (Drosophila)                                             | TIMELESS     | 6.7E-07 | 2.3 | 7.1E-06 |
| 211929_at   | AA527502  | heterogeneous nuclear ribonucleoprotein A3                                | HNRPA3       | 1.8E-05 | 2.3 | 1.8E-04 |
| 222101_s_at | BF222893  | dachsous 1 (Drosophila)                                                   | DCHS1        | 5.2E-04 | 2.3 | 2.3E-04 |
| 203940_s_at | NM_014909 | vasohibin 1                                                               | VASH1        | 6.0E-04 | 2.3 | 1.8E-04 |
| 203026_at   | NM_014872 | zinc finger and BTB domain containing 5                                   | ZBTB5        | 3.7E-08 | 2.3 | 5.5E-05 |
| 212164_at   | AL522296  | transmembrane protein 183A                                                | TMEM183A     | 1.1E-06 | 2.2 | 1.7E-04 |
| 207705_s_at | NM_025176 | KIAA0980 protein                                                          | RP4-691N24.1 | 1.4E-04 | 2.2 | 9.6E-05 |
| 210962_s_at | AB019691  | A kinase (PRKA) anchor protein (yotiao) 9                                 | AKAP9        | 5.2E-08 | 2.2 | 2.0E-05 |
| 210555_s_at | U85430    | nuclear factor of activated T-cells, cytoplasmic, calcineurin-dependent 3 | NFATC3       | 5.4E-07 | 2.2 | 5.1E-05 |
| 220040_x_at | NM_018684 | KIAA1166                                                                  | KIAA1166     | 1.8E-05 | 2.2 | 8.6E-04 |
| 220735_s_at | NM_020654 | SUMO1/sentrin specific peptidase 7                                        | SEN7         | 1.0E-04 | 2.2 | 2.3E-04 |
| 220143_x_at | NM_018032 | LUC7-like (S. cerevisiae)                                                 | LUC7L        | 3.0E-06 | 2.2 | 2.0E-04 |
| 221203_s_at | NM_018023 | YEATS domain containing 2                                                 | YEATS2       | 6.8E-08 | 2.2 | 1.1E-08 |

|             |           |                                                                                                     |               |         |     |         |
|-------------|-----------|-----------------------------------------------------------------------------------------------------|---------------|---------|-----|---------|
| 212710_at   | AL043774  | calmodulin regulated spectrin-associated protein 1                                                  | CAMSAP1       | 2.0E-05 | 2.2 | 8.7E-04 |
| 208838_at   | AB020636  | ---                                                                                                 | ---           | 1.4E-04 | 2.2 | 5.7E-06 |
| 218724_s_at | NM_021809 | TGFB-induced factor 2 (TALE family homeobox)                                                        | TGIF2         | 3.2E-04 | 2.2 | 7.7E-05 |
| 206554_x_at | NM_006515 | SET domain and mariner transposase fusion gene                                                      | SETMAR        | 6.6E-04 | 2.2 | 1.7E-04 |
| 202540_s_at | NM_000859 | 3-hydroxy-3-methylglutaryl-Coenzyme A reductase                                                     | HMGCR         | 4.0E-05 | 2.2 | 4.6E-05 |
| 204060_s_at | NM_005044 | protein kinase, X-linked /// protein kinase, Y-linked                                               | PRKX /// PRKY | 6.8E-05 | 2.2 | 4.9E-05 |
| 203859_s_at | NM_002579 | paralemmin                                                                                          | PALM          | 2.4E-05 | 2.1 | 7.1E-04 |
| 209431_s_at | AF254083  | POZ (BTB) and AT hook containing zinc finger 1                                                      | PATZ1         | 5.4E-06 | 2.1 | 4.5E-04 |
| 212704_at   | AI049962  | zinc finger, CCHC domain containing 11                                                              | ZCCHC11       | 5.6E-06 | 2.1 | 5.2E-05 |
| 207401_at   | NM_002763 | prospero-related homeobox 1                                                                         | PROX1         | 3.7E-04 | 2.1 | 5.1E-04 |
| 204557_s_at | NM_014934 | DAZ interacting protein 1                                                                           | DZIP1         | 6.7E-04 | 2.1 | 6.8E-06 |
| 212753_at   | AI692203  | polycomb group ring finger 3                                                                        | PCGF3         | 8.9E-08 | 2.1 | 1.9E-04 |
| 201051_at   | BE560202  | acidic (leucine-rich) nuclear phosphoprotein 32 family, member A                                    | ANP32A        | 5.9E-05 | 2.1 | 5.0E-04 |
| 212693_at   | BE670928  | MDN1, midasin homolog (yeast)                                                                       | MDN1          | 2.3E-04 | 2.1 | 9.3E-04 |
| 201741_x_at | M69040    | splicing factor, arginine/serine-rich 1 (splicing factor 2, alternate splicing factor)              | SFRS1         | 2.4E-07 | 2.1 | 7.8E-05 |
| 208644_at   | M32721    | poly (ADP-ribose) polymerase family, member 1                                                       | PARP1         | 2.0E-05 | 2.0 | 1.3E-04 |
| 218306_s_at | NM_003922 | hect (homologous to the E6-AP (UBE3A) carboxyl terminus) domain and RCC1 (CHC1)-like domain (RLD) 1 | HERC1         | 1.2E-05 | 2.0 | 1.0E-04 |
| 213743_at   | BE674119  | cyclin T2                                                                                           | CCNT2         | 8.7E-07 | 2.0 | 4.2E-04 |
| 208073_x_at | NM_003316 | tetratricopeptide repeat domain 3                                                                   | TTC3          | 1.6E-06 | 2.0 | 9.5E-04 |
| 209043_at   | AF033026  | 3'-phosphoadenosine 5'-phosphosulfate synthase 1                                                    | PAPSS1        | 6.6E-06 | 2.0 | 3.4E-05 |

|                                                                    |           |                                                                            |                 |         |       |         |
|--------------------------------------------------------------------|-----------|----------------------------------------------------------------------------|-----------------|---------|-------|---------|
| 209715_at                                                          | L07515    | chromobox homolog 5 (HP1 alpha homolog, Drosophila)                        | CBX5            | 9.9E-05 | 2.0   | 3.1E-05 |
| <b>Genes higher expressed in the group of resistant cell lines</b> |           |                                                                            |                 |         |       |         |
| 209016_s_at                                                        | BC002700  | keratin 7                                                                  | KRT7            | 8.9E-05 | -81.0 | 3.5E-06 |
| 222108_at                                                          | AC004010  | adhesion molecule with Ig-like domain 2                                    | AMIGO2          | 1.0E-06 | -46.4 | 1.6E-05 |
| 209008_x_at                                                        | U76549    | keratin 8 /// keratin 8                                                    | KRT8            | 1.1E-05 | -45.6 | 2.5E-04 |
| 202858_at                                                          | NM_006758 | U2 small nuclear RNA auxiliary factor 1                                    | U2AF1           | 1.3E-08 | -42.3 | 4.4E-06 |
| 204070_at                                                          | NM_004585 | retinoic acid receptor responder (tazarotene induced) 3                    | RARRES3         | 4.1E-04 | -40.9 | 3.0E-05 |
| 201324_at                                                          | NM_001423 | epithelial membrane protein 1                                              | EMP1            | 6.9E-12 | -40.0 | 3.4E-06 |
| 211506_s_at                                                        | AF043337  | interleukin 8                                                              | IL8             | 1.7E-06 | -39.6 | 3.5E-05 |
| 209835_x_at                                                        | BC004372  | CD44 molecule (Indian blood group)                                         | CD44            | 2.5E-11 | -38.7 | 3.3E-06 |
| 201858_s_at                                                        | J03223    | proteoglycan 1, secretory granule                                          | PRG1            | 7.6E-07 | -37.9 | 1.5E-04 |
| 202638_s_at                                                        | NM_000201 | intercellular adhesion molecule 1 (CD54), human rhinovirus receptor        | ICAM1           | 1.8E-04 | -34.2 | 2.6E-04 |
| 201596_x_at                                                        | NM_000224 | keratin 18                                                                 | KRT18           | 2.3E-07 | -33.3 | 2.0E-05 |
| 204855_at                                                          | NM_002639 | serpin peptidase inhibitor, clade B (ovalbumin), member 5                  | SERPINB5        | 9.3E-04 | -30.4 | 5.9E-05 |
| 217901_at                                                          | BF031829  | Desmoglein 2                                                               | DSG2            | 8.6E-05 | -30.2 | 7.5E-04 |
| 205083_at                                                          | NM_001159 | aldehyde oxidase 1                                                         | AOX1            | 7.5E-07 | -28.3 | 3.1E-05 |
| 202855_s_at                                                        | AL513917  | solute carrier family 16, member 3 (monocarboxylic acid transporter 4)     | SLC16A3         | 6.4E-08 | -25.5 | 3.1E-06 |
| 215034_s_at                                                        | A1189753  | transmembrane 4 L six family member 1                                      | TM4SF1          | 2.5E-06 | -25.1 | 1.1E-04 |
| 221530_s_at                                                        | BE857425  | basic helix-loop-helix domain containing, class B, 3                       | BHLHB3          | 1.1E-06 | -24.5 | 3.6E-07 |
| 202854_at                                                          | NM_000194 | hypoxanthine phosphoribosyltransferase 1 (Lesch-Nyhan syndrome)            | HPRT1           | 2.6E-08 | -24.1 | 3.5E-06 |
| 201798_s_at                                                        | NM_013451 | fer-1-like 3, myoferlin (C. elegans)                                       | FER1L3          | 2.4E-10 | -23.5 | 2.5E-06 |
| 209803_s_at                                                        | AF001294  | pleckstrin homology-like domain, family A, member 2                        | PHLDA2          | 2.2E-11 | -23.2 | 3.3E-06 |
| 210916_s_at                                                        | AF098641  | CD44 molecule (Indian blood group) /// mitogen-activated protein kinase 10 | CD44 /// MAPK10 | 5.1E-11 | -21.7 | 1.1E-05 |

|             |           |                                                                                               |          |         |       |         |
|-------------|-----------|-----------------------------------------------------------------------------------------------|----------|---------|-------|---------|
| 203108_at   | NM_003979 | G protein-coupled receptor, family C, group 5, member A                                       | GPRC5A   | 5.8E-09 | -20.7 | 1.3E-05 |
| 204420_at   | BG251266  | FOS-like antigen 1                                                                            | FOSL1    | 6.7E-09 | -20.5 | 4.7E-05 |
| 206632_s_at | NM_004900 | apolipoprotein B mRNA editing enzyme, catalytic polypeptide-like 3B                           | APOBEC3B | 3.2E-09 | -20.3 | 1.5E-05 |
| 212444_at   | AA156240  | CDNA clone IMAGE:6025865                                                                      | ---      | 1.2E-07 | -18.4 | 1.0E-04 |
| 204470_at   | NM_001511 | chemokine (C-X-C motif) ligand 1 (melanoma growth stimulating activity, alpha)                | CXCL1    | 1.1E-04 | -17.7 | 2.8E-05 |
| 201109_s_at | AV726673  | thrombospondin 1                                                                              | THBS1    | 4.0E-04 | -17.5 | 9.9E-04 |
| 205627_at   | NM_001785 | cytidine deaminase                                                                            | CDA      | 5.9E-05 | -17.5 | 5.4E-05 |
| 209278_s_at | L27624    | tissue factor pathway inhibitor 2                                                             | TFPI2    | 3.3E-04 | -15.7 | 4.7E-04 |
| 208747_s_at | M18767    | complement component 1, s subcomponent                                                        | C1S      | 1.5E-04 | -15.3 | 8.1E-04 |
| 201842_s_at | A1826799  | EGF-containing fibulin-like extracellular matrix protein 1                                    | EFEMP1   | 8.3E-04 | -14.0 | 8.7E-04 |
| 210592_s_at | M55580    | spermidine/spermine N1-acetyltransferase 1                                                    | SAT1     | 1.2E-08 | -13.9 | 6.3E-06 |
| 204222_s_at | NM_006851 | GLI pathogenesis-related 1 (glioma)                                                           | GLIPR1   | 2.6E-05 | -13.8 | 5.6E-04 |
| 202627_s_at | AL574210  | serpin peptidase inhibitor, clade E (nexin, plasminogen activator inhibitor type 1), member 1 | SERPINE1 | 1.6E-04 | -13.2 | 6.7E-04 |
| 203851_at   | NM_002178 | insulin-like growth factor binding protein 6                                                  | IGFBP6   | 1.8E-06 | -13.2 | 3.0E-04 |
| 208949_s_at | BC001120  | lectin, galactoside-binding, soluble, 3 (galectin 3)                                          | LGALS3   | 2.3E-04 | -13.1 | 6.4E-04 |
| 210042_s_at | AF073890  | cathepsin Z                                                                                   | CTSZ     | 3.0E-07 | -12.9 | 2.1E-05 |
| 206513_at   | NM_004833 | absent in melanoma 2                                                                          | AIM2     | 1.1E-04 | -12.6 | 1.9E-04 |
| 202202_s_at | NM_002290 | laminin, alpha 4                                                                              | LAMA4    | 2.5E-05 | -12.2 | 8.0E-04 |
| 204363_at   | NM_001993 | coagulation factor III (thromboplastin, tissue factor)                                        | F3       | 3.0E-04 | -11.9 | 5.4E-04 |
| 202832_at   | NM_014635 | GRIP and coiled-coil domain containing 2                                                      | GCC2     | 6.1E-04 | -11.9 | 5.5E-05 |



|             |           |                                                                                           |        |         |       |         |
|-------------|-----------|-------------------------------------------------------------------------------------------|--------|---------|-------|---------|
| 202267_at   | NM_005562 | laminin, gamma 2                                                                          | LAMC2  | 3.7E-04 | -11.7 | 1.6E-04 |
| 219759_at   | NM_022350 | leukocyte-derived arginine aminopeptidase                                                 | LRAP   | 1.2E-06 | -11.6 | 1.5E-05 |
| 217744_s_at | NM_022121 | PERP, TP53 apoptosis effector                                                             | PERP   | 1.0E-06 | -11.4 | 4.0E-05 |
| 204279_at   | NM_002800 | proteasome (prosome, macropain) subunit, beta type, 9 (large multifunctional peptidase 2) | PSMB9  | 1.3E-05 | -11.2 | 8.0E-06 |
| 201474_s_at | NM_002204 | integrin, alpha 3 (antigen CD49C, alpha 3 subunit of VLA-3 receptor)                      | ITGA3  | 2.2E-08 | -11.1 | 3.3E-07 |
| 201468_s_at | NM_000903 | NAD(P)H dehydrogenase, quinone 1                                                          | NQO1   | 3.8E-05 | -10.8 | 2.4E-05 |
| 205798_at   | NM_002185 | interleukin 7 receptor /// interleukin 7 receptor                                         | IL7R   | 3.2E-07 | -10.7 | 7.5E-04 |
| 221059_s_at | NM_021615 | coactosin-like 1 (Dictyostelium)                                                          | COTL1  | 3.8E-09 | -10.5 | 2.5E-06 |
| 218211_s_at | NM_024101 | melanophilin                                                                              | MLPH   | 6.2E-06 | -10.4 | 6.7E-05 |
| 201042_at   | AL031651  | transglutaminase 2 (C polypeptide, protein-glutamine-gamma-glutamyltransferase)           | TGM2   | 1.4E-04 | -10.1 | 6.7E-04 |
| 212473_s_at | BE965029  | microtubule associated monooxygenase, calponin and LIM domain containing 2                | MICAL2 | 1.8E-05 | -10.1 | 9.7E-04 |
| 201631_s_at | NM_003897 | immediate early response 3                                                                | IER3   | 1.9E-06 | -9.3  | 4.3E-05 |
| 210896_s_at | AF306765  | aspartate beta-hydroxylase                                                                | ASPH   | 9.8E-08 | -9.2  | 1.4E-04 |
| 208581_x_at | NM_005952 | metallothionein 1X                                                                        | MT1X   | 3.8E-06 | -8.9  | 1.9E-04 |
| 214446_at   | NM_012081 | elongation factor, RNA polymerase II, 2                                                   | ELL2   | 4.9E-10 | -8.7  | 3.2E-05 |
| 201170_s_at | NM_003670 | basic helix-loop-helix domain containing, class B, 2                                      | BHLHB2 | 2.5E-07 | -8.5  | 3.5E-06 |
| 202862_at   | NM_000137 | fumarylacetoacetate hydrolase (fumarylacetoacetase)                                       | FAH    | 4.0E-07 | -8.5  | 1.6E-05 |
| 203234_at   | NM_003364 | uridine phosphorylase 1                                                                   | UPP1   | 1.7E-06 | -8.5  | 2.2E-05 |
| 218322_s_at | NM_016234 | acyl-CoA synthetase long-chain family member 5                                            | ACSL5  | 9.4E-05 | -8.3  | 1.9E-06 |
| 206461_x_at | NM_005951 | metallothionein 1H                                                                        | MT1H   | 1.1E-06 | -8.2  | 8.6E-05 |
| 212185_x_at | NM_005953 | metallothionein 2A                                                                        | MT2A   | 1.4E-06 | -8.1  | 1.9E-04 |

|             |           |                                                                                           |           |         |      |         |
|-------------|-----------|-------------------------------------------------------------------------------------------|-----------|---------|------|---------|
| 208790_s_at | AF312393  | polymerase I and transcript release factor                                                | PTRF      | 3.4E-05 | -7.8 | 8.7E-04 |
| 36711_at    | AL021977  | v-maf musculoaponeurotic fibrosarcoma oncogene homolog F (avian)                          | MAFF      | 7.4E-09 | -7.7 | 9.7E-07 |
| 218084_x_at | NM_014164 | FXYD domain containing ion transport regulator 5                                          | FXYD5     | 5.2E-06 | -7.6 | 5.1E-06 |
| 217996_at   | AA576961  | pleckstrin homology-like domain, family A, member 1                                       | PHLDA1    | 3.8E-07 | -7.5 | 2.5E-04 |
| 211456_x_at | AF333388  | metallothionein 1H-like protein                                                           | LOC645745 | 1.3E-06 | -7.4 | 1.1E-04 |
| 213865_at   | AI378788  | discoidin, CUB and LCCL domain containing 2                                               | DCBLD2    | 2.3E-07 | -7.4 | 5.7E-04 |
| 209514_s_at | BE502030  | RAB27A, member RAS oncogene family                                                        | RAB27A    | 2.3E-05 | -7.3 | 3.2E-04 |
| 209310_s_at | U25804    | caspase 4, apoptosis-related cysteine peptidase                                           | CASP4     | 1.4E-05 | -7.1 | 1.3E-04 |
| 209040_s_at | U17496    | proteasome (prosome, macropain) subunit, beta type, 8 (large multifunctional peptidase 7) | PSMB8     | 1.8E-05 | -7.1 | 6.9E-06 |
| 205100_at   | NM_005110 | glutamine-fructose-6-phosphate transaminase 2                                             | GFPT2     | 3.3E-06 | -7.1 | 2.1E-04 |
| 213572_s_at | AI554300  | serpin peptidase inhibitor, clade B (ovalbumin), member 1                                 | SERPINB1  | 1.4E-07 | -7.0 | 1.4E-07 |
| 209679_s_at | BC003379  | small trans-membrane and glycosylated protein                                             | LOC57228  | 2.4E-06 | -7.0 | 1.1E-04 |
| 203821_at   | NM_001945 | heparin-binding EGF-like growth factor                                                    | HBEGF     | 3.8E-05 | -6.9 | 9.8E-05 |
| 220016_at   | NM_024060 | AHNAK nucleoprotein (desmoyokin)                                                          | AHNAK     | 5.1E-05 | -6.9 | 2.4E-05 |
| 212070_at   | AL554008  | G protein-coupled receptor 56                                                             | GPR56     | 6.1E-05 | -6.8 | 1.6E-07 |
| 211429_s_at | AF119873  | serpin peptidase inhibitor, clade A (alpha-1 antiproteinase, antitrypsin), member 1       | SERPINA1  | 5.0E-04 | -6.8 | 5.1E-05 |
| 202863_at   | NM_003113 | SP100 nuclear antigen                                                                     | SP100     | 1.7E-07 | -6.7 | 1.4E-05 |
| 216336_x_at | AL031602  | metallothionein 1M                                                                        | MT1M      | 5.3E-06 | -6.6 | 1.3E-05 |
| 217165_x_at | M10943    | metallothionein 1F (functional)                                                           | MT1F      | 5.6E-06 | -6.6 | 1.9E-04 |

|             |           |                                                                                                    |          |         |      |         |
|-------------|-----------|----------------------------------------------------------------------------------------------------|----------|---------|------|---------|
| 201983_s at | AW157070  | epidermal growth factor receptor (erythroblastic leukemia viral (v-erb-b) oncogene homolog, avian) | EGFR     | 1.6E-06 | -6.5 | 2.8E-04 |
| 210538_s at | U37546    | baculoviral IAP repeat-containing 3                                                                | BIRC3    | 1.6E-04 | -6.5 | 5.4E-05 |
| 201926_s at | BC001288  | CD55 molecule, decay accelerating factor for complement (Cromer blood group)                       | CD55     | 3.6E-06 | -6.5 | 3.4E-04 |
| 208944_at   | D50683    | transforming growth factor, beta receptor II (70/80kDa)                                            | TGFB2    | 1.2E-06 | -6.5 | 9.7E-04 |
| 208690_s at | BC000915  | PDZ and LIM domain 1 (elfin)                                                                       | PDLIM1   | 1.6E-04 | -6.4 | 5.6E-05 |
| 210117_at   | AF311312  | sperm associated antigen 1                                                                         | SPAG1    | 3.6E-05 | -6.4 | 4.2E-04 |
| 210138_at   | AF074979  | regulator of G-protein signalling 20                                                               | RGS20    | 5.9E-06 | -6.3 | 1.4E-05 |
| 217478_s at | X76775    | major histocompatibility complex, class II, DM alpha                                               | HLA-DMA  | 2.9E-04 | -6.2 | 1.3E-04 |
| 202499_s at | NM_006931 | solute carrier family 2 (facilitated glucose transporter), member 3                                | SLC2A3   | 1.1E-06 | -6.2 | 2.0E-04 |
| 214791_at   | AK023116  | hypothetical protein BC004921                                                                      | LOC93349 | 1.1E-06 | -6.1 | 2.6E-06 |
| 209457_at   | U16996    | dual specificity phosphatase 5                                                                     | DUSP5    | 1.5E-05 | -6.1 | 1.7E-04 |
| 207574_s at | NM_015675 | growth arrest and DNA-damage-inducible, beta                                                       | GADD45B  | 1.2E-06 | -6.0 | 1.6E-04 |
| 214866_at   | X74039    | plasminogen activator, urokinase receptor                                                          | PLAUR    | 8.1E-07 | -5.8 | 3.8E-04 |
| 211612_s at | U62858    | interleukin 13 receptor, alpha 1 /// interleukin 13 receptor, alpha 1                              | IL13RA1  | 1.5E-07 | -5.7 | 1.1E-05 |
| 207265_s at | NM_016657 | KDEL (Lys-Asp-Glu-Leu) endoplasmic reticulum protein retention receptor 3                          | KDELR3   | 1.4E-07 | -5.6 | 5.0E-04 |
| 213274_s at | AA020826  | cathepsin B                                                                                        | CTSB     | 6.6E-05 | -5.6 | 2.2E-04 |
| 200632_s at | NM_006096 | N-myc downstream regulated gene 1                                                                  | NDRG1    | 5.2E-05 | -5.5 | 2.1E-04 |
| 222150_s at | AK026747  | hypothetical protein LOC54103                                                                      | LOC54103 | 8.8E-07 | -5.5 | 1.1E-06 |
| 210136_at   | AW070431  | myelin basic protein                                                                               | MBP      | 1.8E-06 | -5.4 | 5.9E-04 |
| 216985_s at | AJ002077  | syntaxin 3                                                                                         | STX3     | 1.7E-06 | -5.4 | 3.5E-06 |
| 201412_at   | NM_014045 | low density lipoprotein receptor-related protein 10                                                | LRP10    | 3.9E-06 | -5.3 | 1.2E-04 |

|             |           |                                                                                                 |          |         |      |         |
|-------------|-----------|-------------------------------------------------------------------------------------------------|----------|---------|------|---------|
| 205579_at   | NM_000861 | histamine receptor H1                                                                           | HRH1     | 1.0E-06 | -5.3 | 9.3E-06 |
| 202733_at   | NM_004199 | procollagen-proline, 2-oxoglutarate 4-dioxygenase (proline 4-hydroxylase), alpha polypeptide II | P4HA2    | 5.2E-04 | -5.3 | 3.8E-04 |
| 210987_x_at | M19267    | tropomyosin 1 (alpha)                                                                           | TPM1     | 1.7E-04 | -5.2 | 3.2E-04 |
| 204032_at   | NM_003567 | breast cancer anti-estrogen resistance 3                                                        | BCAR3    | 2.8E-06 | -5.1 | 7.4E-04 |
| 209706_at   | AF247704  | NK3 transcription factor related, locus 1 (Drosophila)                                          | NKX3-1   | 2.0E-05 | -5.1 | 2.3E-05 |
| 205499_at   | NM_014467 | sushi-repeat-containing protein, X-linked 2                                                     | SRPX2    | 6.7E-06 | -5.0 | 1.2E-05 |
| 202085_at   | NM_004817 | tight junction protein 2 (zona occludens 2)                                                     | TJP2     | 9.4E-04 | -4.9 | 5.0E-04 |
| 219620_x_at | NM_017723 | hypothetical protein FLJ20245                                                                   | FLJ20245 | 7.0E-07 | -4.9 | 2.3E-04 |
| 212923_s_at | AK024828  | chromosome 6 open reading frame 145                                                             | C6orf145 | 2.4E-08 | -4.9 | 6.1E-05 |
| 212463_at   | BE379006  | CD59 molecule, complement regulatory protein                                                    | CD59     | 1.8E-07 | -4.8 | 2.4E-04 |
| 201506_at   | NM_000358 | transforming growth factor, beta-induced, 68kDa                                                 | TGFBI    | 1.9E-04 | -4.8 | 6.6E-04 |
| 202180_s_at | NM_017458 | major vault protein                                                                             | MVP      | 6.1E-05 | -4.7 | 9.6E-05 |
| 203726_s_at | NM_000227 | laminin, alpha 3                                                                                | LAMA3    | 9.8E-04 | -4.6 | 6.6E-04 |
| 212543_at   | U83115    | absent in melanoma 1                                                                            | AIM1     | 4.0E-04 | -4.6 | 1.4E-04 |
| 205266_at   | NM_002309 | leukemia inhibitory factor (cholinergic differentiation factor)                                 | LIF      | 2.5E-07 | -4.6 | 3.7E-06 |
| 203939_at   | NM_002526 | 5'-nucleotidase, ecto (CD73)                                                                    | NT5E     | 8.0E-04 | -4.6 | 6.7E-04 |
| 222294_s_at | AW971415  | CDNA clone IMAGE:5745639                                                                        | ---      | 4.1E-05 | -4.6 | 1.2E-04 |
| 206034_at   | NM_002640 | serpin peptidase inhibitor, clade B (ovalbumin), member 8                                       | SERPINB8 | 5.9E-06 | -4.6 | 5.9E-04 |
| 214459_x_at | M12679    | major histocompatibility complex, class I, C                                                    | HLA-C    | 9.7E-04 | -4.6 | 1.3E-04 |
| 202990_at   | NM_002863 | phosphorylase, glycogen; liver (Hers disease, glycogen storage disease type VI)                 | PYGL     | 1.5E-05 | -4.6 | 8.0E-04 |

|             |           |                                                                  |           |         |      |         |
|-------------|-----------|------------------------------------------------------------------|-----------|---------|------|---------|
| 205896_at   | NM_003059 | solute carrier family 22 (organic cation transporter), member 4  | SLC22A4   | 2.3E-05 | -4.5 | 1.8E-04 |
| 203041_s_at | J04183    | lysosomal-associated membrane protein 2                          | LAMP2     | 1.2E-04 | -4.5 | 2.7E-05 |
| 201471_s_at | NM_003900 | sequestosome 1                                                   | SQSTM1    | 3.9E-06 | -4.5 | 2.0E-04 |
| 218631_at   | NM_021732 | arginine vasopressin-induced 1                                   | AVPI1     | 2.9E-05 | -4.5 | 3.1E-05 |
| 204981_at   | NM_002555 | solute carrier family 22 (organic cation transporter), member 18 | SLC22A18  | 6.9E-06 | -4.5 | 1.1E-04 |
| 203005_at   | NM_002342 | lymphotoxin beta receptor (TNFR superfamily, member 3)           | LTBR      | 2.5E-07 | -4.5 | 2.8E-07 |
| 200766_at   | NM_001909 | cathepsin D                                                      | CTSD      | 3.4E-05 | -4.4 | 9.5E-06 |
| 204745_x_at | NM_005950 | metallothionein 1G                                               | MT1G      | 4.0E-06 | -4.4 | 2.8E-04 |
| 219165_at   | NM_021630 | PDZ and LIM domain 2 (mystique)                                  | PDLIM2    | 9.2E-06 | -4.3 | 9.7E-04 |
| 201482_at   | NM_002826 | quiescin Q6                                                      | QSCN6     | 1.7E-05 | -4.3 | 6.1E-05 |
| 218368_s_at | NM_016639 | tumor necrosis factor receptor superfamily, member 12A           | TNFRSF12A | 7.6E-07 | -4.2 | 6.7E-05 |
| 209873_s_at | AF053719  | plakophilin 3                                                    | PKP3      | 3.2E-04 | -4.2 | 7.3E-05 |
| 204254_s_at | NM_000376 | vitamin D (1,25-dihydroxyvitamin D3) receptor                    | VDR       | 3.1E-05 | -4.2 | 5.6E-06 |
| 203430_at   | NM_014320 | heme binding protein 2                                           | HEBP2     | 4.5E-05 | -4.2 | 9.1E-05 |
| 202531_at   | NM_002198 | interferon regulatory factor 1                                   | IRF1      | 4.4E-05 | -4.1 | 3.0E-05 |
| 205398_s_at | NM_005902 | SMAD family member 3                                             | SMAD3     | 4.4E-06 | -4.1 | 7.5E-04 |
| 203518_at   | NM_000081 | lysosomal trafficking regulator                                  | LYST      | 5.2E-04 | -4.1 | 2.4E-04 |
| 218273_s_at | NM_018444 | protein phosphatase 2C, magnesium-dependent, catalytic subunit   | PPM2C     | 8.3E-08 | -4.0 | 2.1E-04 |
| 202087_s_at | NM_001912 | cathepsin L                                                      | CTSL      | 9.0E-05 | -4.0 | 1.6E-04 |
| 218764_at   | NM_024064 | protein kinase C, eta                                            | PRKCH     | 7.8E-05 | -3.9 | 1.2E-05 |
| 201422_at   | NM_006332 | interferon, gamma-inducible protein 30                           | IFI30     | 7.7E-04 | -3.9 | 2.7E-04 |
| 212196_at   | AW242916  | Interleukin 6 signal transducer (gp130, oncostatin M receptor)   | IL6ST     | 4.5E-05 | -3.9 | 8.0E-04 |
| 202201_at   | NM_000713 | biliverdin reductase B (flavin reductase (NADPH))                | BLVRB     | 3.3E-05 | -3.8 | 4.3E-06 |

|             |           |                                                                                                     |                         |         |      |         |
|-------------|-----------|-----------------------------------------------------------------------------------------------------|-------------------------|---------|------|---------|
| 209417_s_at | BC001356  | interferon-induced protein 35                                                                       | IFI35                   | 6.6E-05 | -3.8 | 2.9E-04 |
| 203329_at   | NM_002845 | protein tyrosine phosphatase, receptor type, M                                                      | PTPRM                   | 3.9E-06 | -3.8 | 5.8E-05 |
| 200701_at   | NM_006432 | Niemann-Pick disease, type C2                                                                       | NPC2                    | 1.2E-04 | -3.7 | 8.2E-04 |
| 219622_at   | NM_017817 | RAB20, member RAS oncogene family                                                                   | RAB20                   | 8.5E-04 | -3.7 | 8.7E-04 |
| 207467_x_at | NM_001750 | calpastatin                                                                                         | CAST                    | 6.6E-06 | -3.6 | 4.1E-04 |
| 205640_at   | NM_000694 | aldehyde dehydrogenase 3 family, member B1                                                          | ALDH3B1                 | 7.4E-07 | -3.6 | 1.5E-07 |
| 203215_s_at | AA877789  | myosin VI                                                                                           | MYO6                    | 9.1E-04 | -3.5 | 4.0E-05 |
| 217998_at   | NM_007350 | pleckstrin homology-like domain, family A, member 1 /// hypothetical LOC652993                      | PHLDA1 /// LOC652993    | 4.5E-07 | -3.4 | 2.1E-04 |
| 204158_s_at | NM_006019 | T-cell, immune regulator 1, ATPase, H <sup>+</sup> transporting, lysosomal V0 subunit A3            | TCIRG1                  | 5.4E-05 | -3.4 | 7.5E-04 |
| 208637_x_at | BC003576  | actinin, alpha 1                                                                                    | ACTN1                   | 1.2E-07 | -3.4 | 4.4E-05 |
| 218844_at   | NM_025149 | hypothetical protein FLJ20920                                                                       | FLJ20920                | 1.5E-04 | -3.4 | 8.3E-05 |
| 219716_at   | NM_030641 | apolipoprotein L, 6                                                                                 | APOL6                   | 1.4E-05 | -3.4 | 2.2E-08 |
| 204747_at   | NM_001549 | interferon-induced protein with tetratricopeptide repeats 3                                         | IFIT3                   | 1.7E-06 | -3.4 | 4.2E-04 |
| 202693_s_at | AW194730  | serine/threonine kinase 17a (apoptosis-inducing)                                                    | STK17A                  | 1.6E-04 | -3.3 | 6.4E-04 |
| 210276_s_at | AF281030  | TRIO and F-actin binding protein                                                                    | TRIOBP                  | 2.5E-04 | -3.3 | 3.4E-04 |
| 205730_s_at | NM_014945 | actin binding LIM protein family, member 3                                                          | ABLIM3                  | 3.2E-05 | -3.3 | 1.2E-04 |
| 202861_at   | NM_002616 | period homolog 1 (Drosophila)                                                                       | PER1                    | 4.8E-05 | -3.3 | 5.6E-05 |
| 217739_s_at | NM_005746 | pre-B-cell colony enhancing factor 1                                                                | PBEF1                   | 7.8E-06 | -3.3 | 1.4E-04 |
| 221044_s_at | NM_021616 | tripartite motif-containing 34 /// tripartite motif-containing 6 and tripartite motif-containing 34 | TRIM34 /// TRIM6-TRIM34 | 4.7E-06 | -3.3 | 3.1E-04 |
| 207375_s_at | NM_002189 | interleukin 15 receptor, alpha                                                                      | IL15RA                  | 1.1E-05 | -3.3 | 1.3E-04 |
| 213816_s_at | AA005141  | met proto-oncogene (hepatocyte growth factor receptor)                                              | MET                     | 1.8E-06 | -3.2 | 9.9E-04 |
| 221843_s_at | AA195017  | KIAA1609                                                                                            | KIAA1609                | 4.6E-05 | -3.2 | 3.4E-05 |

|             |           |                                                                                                  |          |         |      |         |
|-------------|-----------|--------------------------------------------------------------------------------------------------|----------|---------|------|---------|
| 218983_at   | NM_016546 | complement component 1, r subcomponent-like                                                      | C1RL     | 3.6E-04 | -3.2 | 3.1E-04 |
| 207357_s_at | NM_017540 | UDP-N-acetyl-alpha-D-galactosamine:polypeptide N-acetylgalactosaminyltransferase 10 (GalNAc-T10) | GALNT10  | 3.9E-06 | -3.2 | 7.3E-05 |
| 218292_s_at | NM_016203 | protein kinase, AMP-activated, gamma 2 non-catalytic subunit                                     | PRKAG2   | 1.2E-06 | -3.2 | 1.4E-04 |
| 207643_s_at | NM_001065 | tumor necrosis factor receptor superfamily, member 1A                                            | TNFRSF1A | 1.5E-05 | -3.2 | 2.6E-04 |
| 204629_at   | NM_013327 | parvin, beta                                                                                     | PARVB    | 1.1E-04 | -3.1 | 7.5E-04 |
| 212552_at   | BE617588  | hippocalcin-like 1                                                                               | HPCAL1   | 1.5E-04 | -3.1 | 3.1E-04 |
| 204682_at   | NM_000428 | latent transforming growth factor beta binding protein 2                                         | LTBP2    | 1.1E-05 | -3.1 | 4.0E-06 |
| 219691_at   | NM_017654 | sterile alpha motif domain containing 9                                                          | SAMD9    | 6.1E-05 | -3.1 | 3.5E-05 |
| 200885_at   | NM_005167 | ras homolog gene family, member C                                                                | RHOC     | 1.6E-06 | -3.1 | 2.0E-04 |
| 212737_at   | AL513583  | GM2 ganglioside activator                                                                        | GM2A     | 1.7E-05 | -3.0 | 7.2E-06 |
| 210514_x_at | AF226990  | HLA-G histocompatibility antigen, class I, G                                                     | HLA-G    | 7.8E-04 | -3.0 | 7.4E-04 |
| 201944_at   | NM_000521 | hexosaminidase B (beta polypeptide)                                                              | HEXB     | 9.4E-07 | -2.9 | 4.2E-04 |
| 218849_s_at | NM_006663 | protein phosphatase 1, regulatory (inhibitor) subunit 13 like                                    | PPP1R13L | 4.5E-05 | -2.9 | 2.4E-04 |
| 204693_at   | NM_007061 | CDC42 effector protein (Rho GTPase binding) 1                                                    | CDC42EP1 | 5.0E-05 | -2.9 | 2.8E-04 |
| 209546_s_at | AF323540  | apolipoprotein L, 1                                                                              | APOL1    | 3.7E-06 | -2.9 | 1.2E-05 |
| 204034_at   | NM_014297 | ethylmalonic encephalopathy 1                                                                    | ETHE1    | 3.8E-06 | -2.9 | 4.2E-05 |
| 202307_s_at | NM_000593 | transporter 1, ATP-binding cassette, sub-family B (MDR/TAP)                                      | TAP1     | 3.3E-04 | -2.9 | 2.4E-04 |
| 210978_s_at | BC002616  | transgelin 2                                                                                     | TAGLN2   | 2.5E-04 | -2.9 | 8.6E-05 |
| 202275_at   | NM_000402 | glucose-6-phosphate dehydrogenase                                                                | G6PD     | 3.7E-04 | -2.9 | 3.0E-04 |
| 217150_s_at | S73854    | neurofibromin 2 (bilateral acoustic neuroma)                                                     | NF2      | 3.3E-05 | -2.9 | 1.2E-04 |
| 202545_at   | NM_006254 | protein kinase C, delta                                                                          | PRKCD    | 1.5E-05 | -2.9 | 7.9E-04 |

|             |           |                                                                 |          |         |      |         |
|-------------|-----------|-----------------------------------------------------------------|----------|---------|------|---------|
| 214783_s_at | BG177920  | annexin A11                                                     | ANXA11   | 7.0E-07 | -2.8 | 6.2E-05 |
| 214077_x_at | H15129    | Meis1 homolog 3 (mouse) pseudogene 1                            | MEIS3P1  | 7.1E-04 | -2.8 | 9.5E-04 |
| 213083_at   | AJ005866  | solute carrier family 35, member D2                             | SLC35D2  | 4.3E-04 | -2.8 | 4.9E-04 |
| 220049_s_at | NM_025239 | programmed cell death 1 ligand 2                                | PDCD1LG2 | 2.7E-04 | -2.8 | 3.1E-05 |
| 211926_s_at | AI827941  | myosin, heavy chain 9, non-muscle                               | MYH9     | 1.6E-05 | -2.8 | 6.2E-04 |
| 221291_at   | NM_025217 | UL16 binding protein 2                                          | ULBP2    | 1.6E-04 | -2.8 | 2.4E-04 |
| 208613_s_at | AV712733  | filamin B, beta (actin binding protein 278)                     | FLNB     | 5.2E-04 | -2.7 | 6.0E-04 |
| 218747_s_at | NM_018009 | TAP binding protein-like                                        | TAPBPL   | 3.6E-04 | -2.7 | 7.4E-05 |
| 219684_at   | NM_022147 | receptor (chemosensory) transporter protein 4                   | RTP4     | 1.4E-04 | -2.7 | 8.0E-04 |
| 206284_x_at | NM_001834 | clathrin, light chain (Lcb)                                     | CLTB     | 2.0E-04 | -2.6 | 1.5E-06 |
| 201847_at   | NM_000235 | lipase A, lysosomal acid, cholesterol esterase (Wolman disease) | LIPA     | 3.7E-05 | -2.6 | 9.1E-04 |
| 205192_at   | NM_003954 | mitogen-activated protein kinase kinase kinase 14               | MAP3K14  | 3.4E-05 | -2.6 | 2.4E-04 |
| 221473_x_at | U49188    | serine incorporator 3                                           | SERINC3  | 1.5E-07 | -2.6 | 6.7E-05 |
| 218194_at   | NM_015523 | REX2, RNA exonuclease 2 homolog (S. cerevisiae)                 | REXO2    | 8.9E-06 | -2.6 | 6.6E-04 |
| 205084_at   | NM_018844 | B-cell receptor-associated protein 29                           | BCAP29   | 2.8E-06 | -2.6 | 4.9E-04 |
| 202996_at   | NM_021173 | polymerase (DNA-directed), delta 4                              | POLD4    | 6.3E-05 | -2.6 | 5.3E-04 |
| 208872_s_at | AA814140  | receptor accessory protein 5                                    | REEP5    | 4.6E-05 | -2.6 | 2.8E-04 |
| 60471_at    | AA625133  | Ras and Rab interactor 3                                        | RIN3     | 1.5E-05 | -2.6 | 6.8E-05 |
| 203925_at   | NM_002061 | glutamate-cysteine ligase, modifier subunit                     | GCLM     | 6.8E-05 | -2.5 | 5.9E-06 |
| 201587_s_at | NM_001569 | interleukin-1 receptor-associated kinase 1                      | IRAK1    | 1.1E-05 | -2.5 | 8.4E-05 |
| 204769_s_at | M74447    | transporter 2, ATP-binding cassette, sub-family B (MDR/TAP)     | TAP2     | 9.5E-06 | -2.5 | 9.6E-06 |
| 201953_at   | NM_006384 | calcium and integrin binding 1 (calmyrin)                       | CIB1     | 2.1E-06 | -2.5 | 5.0E-04 |



|             |           |                                                                                                |                |         |      |         |
|-------------|-----------|------------------------------------------------------------------------------------------------|----------------|---------|------|---------|
| 215723_s_at | AJ276230  | phospholipase D1, phosphatidylcholine-specific                                                 | PLD1           | 8.6E-06 | -2.5 | 4.7E-05 |
| 205032_at   | NM_002203 | integrin, alpha 2 (CD49B, alpha 2 subunit of VLA-2 receptor)                                   | ITGA2          | 6.5E-04 | -2.5 | 7.1E-04 |
| 203045_at   | NM_004148 | ninjurin 1                                                                                     | NINJ1          | 2.9E-05 | -2.5 | 4.0E-04 |
| 221641_s_at | AF241787  | acyl-CoA thioesterase 9                                                                        | ACOT9          | 8.9E-05 | -2.5 | 5.5E-04 |
| 209039_x_at | AF001434  | EH-domain containing 1                                                                         | EHD1           | 5.2E-05 | -2.5 | 8.8E-04 |
| 209179_s_at | BC003164  | leukocyte receptor cluster (LRC) member 4                                                      | LENG4          | 3.1E-06 | -2.4 | 1.5E-04 |
| 206670_s_at | NM_013445 | glutamate decarboxylase 1 (brain, 67kDa) /// LAG1 homolog, ceramide synthase 6 (S. cerevisiae) | GAD1 /// LASS6 | 2.9E-04 | -2.4 | 8.0E-04 |
| 201360_at   | NM_000099 | cystatin C (amyloid angiopathy and cerebral hemorrhage)                                        | CST3           | 5.6E-05 | -2.4 | 7.7E-04 |
| 53720_at    | AI862559  | hypothetical protein FLJ11286                                                                  | FLJ11286       | 3.2E-04 | -2.4 | 4.4E-04 |
| 201975_at   | NM_002956 | restin (Reed-Steinberg cell-expressed intermediate filament-associated protein)                | RSN            | 1.4E-04 | -2.4 | 3.7E-04 |
| 200618_at   | NM_006148 | LIM and SH3 protein 1                                                                          | LASP1          | 3.8E-05 | -2.4 | 8.0E-04 |
| 209575_at   | BC001903  | interleukin 10 receptor, beta                                                                  | IL10RB         | 4.2E-04 | -2.3 | 9.6E-06 |
| 220761_s_at | NM_016281 | TAO kinase 3                                                                                   | TAOK3          | 3.7E-04 | -2.3 | 5.2E-06 |
| 208659_at   | AF034607  | chloride intracellular channel 1                                                               | CLIC1          | 1.9E-08 | -2.3 | 4.1E-05 |
| 213272_s_at | AF070596  | transmembrane protein 159                                                                      | TMEM159        | 2.0E-05 | -2.3 | 1.1E-04 |
| 219710_at   | NM_024577 | SH3 domain and tetratricopeptide repeats 2                                                     | SH3TC2         | 3.3E-04 | -2.3 | 5.1E-05 |
| 203258_at   | NM_006442 | DR1-associated protein 1 (negative cofactor 2 alpha)                                           | DRAP1          | 1.9E-05 | -2.3 | 5.7E-04 |
| 221534_at   | AF073483  | chromosome 11 open reading frame 68                                                            | C11orf68       | 2.1E-04 | -2.3 | 1.5E-04 |
| 202122_s_at | NM_005817 | mannose-6-phosphate receptor binding protein 1                                                 | M6PRBP1        | 6.5E-07 | -2.3 | 4.4E-04 |
| 202205_at   | NM_003370 | vasodilator-stimulated phosphoprotein                                                          | VASP           | 7.5E-06 | -2.2 | 1.6E-05 |
| 203920_at   | NM_005693 | nuclear receptor subfamily 1, group H, member 3                                                | NR1H3          | 3.6E-04 | -2.2 | 5.5E-04 |

|             |           |                                                                           |          |         |      |         |
|-------------|-----------|---------------------------------------------------------------------------|----------|---------|------|---------|
| 207196_s at | NM_006058 | TNFAIP3 interacting protein 1                                             | TNIP1    | 1.1E-05 | -2.2 | 4.1E-04 |
| 218881_s at | NM_024530 | FOS-like antigen 2                                                        | FOSL2    | 1.1E-07 | -2.2 | 1.8E-06 |
| 204398_s at | NM_012155 | echinoderm microtubule associated protein like 2                          | EML2     | 4.9E-05 | -2.2 | 2.5E-06 |
| 202378_s at | NM_017526 | leptin receptor overlapping transcript                                    | LEPROT   | 3.7E-04 | -2.2 | 1.3E-04 |
| 219332_at   | NM_024723 | MICAL-like 2                                                              | MICALL2  | 4.4E-05 | -2.2 | 6.4E-04 |
| 203454_s at | NM_004045 | ATX1 antioxidant protein 1 homolog (yeast)                                | ATOX1    | 5.9E-06 | -2.2 | 3.0E-04 |
| 208757_at   | BC001123  | transmembrane emp24 protein transport domain containing 9                 | TMED9    | 7.9E-07 | -2.2 | 8.7E-05 |
| 209584_x at | AF165520  | apolipoprotein B mRNA editing enzyme, catalytic polypeptide-like 3C       | APOBEC3C | 4.1E-05 | -2.2 | 2.0E-04 |
| 220174_at   | NM_025061 | leucine rich repeat containing 8 family, member E                         | LRRC8E   | 9.7E-05 | -2.2 | 6.2E-04 |
| 200709_at   | NM_000801 | FK506 binding protein 1A, 12kDa                                           | FKBP1A   | 2.7E-06 | -2.2 | 5.8E-05 |
| 215037_s at | U72398    | BCL2-like 1                                                               | BCL2L1   | 5.9E-04 | -2.2 | 4.3E-04 |
| 221926_s at | BF196320  | interleukin 17 receptor C                                                 | IL17RC   | 2.2E-06 | -2.2 | 5.7E-06 |
| 203279_at   | NM_014674 | ER degradation enhancer, mannosidase alpha-like 1                         | EDEM1    | 8.4E-06 | -2.2 | 5.7E-04 |
| 218109_s at | NM_022736 | major facilitator superfamily domain containing 1                         | MFSD1    | 1.7E-04 | -2.2 | 1.5E-04 |
| 221561_at   | L21934    | sterol O-acyltransferase (acyl-Coenzyme A: cholesterol acyltransferase) 1 | SOAT1    | 5.8E-05 | -2.2 | 8.8E-04 |
| 214703_s at | AW954107  | mannosidase, alpha, class 2B, member 2                                    | MAN2B2   | 2.4E-04 | -2.1 | 9.9E-04 |
| 202377_at   | AW026535  | ---                                                                       | ---      | 1.5E-04 | -2.1 | 7.5E-05 |
| 202908_at   | NM_006005 | Wolfram syndrome 1 (wolframin)                                            | WFS1     | 7.7E-05 | -2.1 | 5.1E-04 |
| 40420_at    | AB015718  | serine/threonine kinase 10                                                | STK10    | 1.6E-07 | -2.1 | 1.1E-04 |
| 209940_at   | AF083068  | poly (ADP-ribose) polymerase family, member 3                             | PARP3    | 7.4E-06 | -2.1 | 1.7E-04 |
| 208701_at   | BC000373  | Amyloid beta (A4) precursor-like protein 2                                | APLP2    | 1.2E-04 | -2.1 | 8.5E-05 |

|             |           |                                                                                        |         |         |      |         |
|-------------|-----------|----------------------------------------------------------------------------------------|---------|---------|------|---------|
| 218065_s_at | NM_020644 | TMEM9 domain family, member B                                                          | TMEM9B  | 6.5E-06 | -2.1 | 1.3E-04 |
| 204458_at   | AL110209  | lysophospholipase 3 (lysosomal phospholipase A2)                                       | LYPLA3  | 8.0E-05 | -2.1 | 5.9E-04 |
| 218749_s_at | NM_024959 | solute carrier family 24 (sodium/potassium/calcium exchanger), member 6                | SLC24A6 | 2.0E-07 | -2.1 | 2.1E-05 |
| 220189_s_at | NM_014275 | mannosyl (alpha-1,3-)-glycoprotein beta-1,4-N-acetylglucosaminyltransferase, isozyme B | MGAT4B  | 7.0E-05 | -2.1 | 1.4E-04 |
| 218498_s_at | NM_014584 | ERO1-like ( <i>S. cerevisiae</i> )                                                     | ERO1L   | 1.5E-06 | -2.1 | 8.2E-05 |
| 201022_s_at | NM_006870 | destrin (actin depolymerizing factor)                                                  | DSTN    | 5.2E-06 | -2.1 | 3.3E-06 |
| 208407_s_at | NM_001331 | catenin (cadherin-associated protein), delta 1                                         | CTNND1  | 4.0E-04 | -2.1 | 7.8E-04 |
| 336_at      | D38081    | thromboxane A2 receptor                                                                | TBXA2R  | 4.7E-04 | -2.0 | 8.4E-05 |
| 221087_s_at | NM_014349 | apolipoprotein L, 3                                                                    | APOL3   | 1.5E-04 | -2.0 | 2.1E-05 |
| 218154_at   | NM_024736 | gasdermin domain containing 1                                                          | GSDMDC1 | 9.5E-06 | -2.0 | 1.3E-04 |

1. Fold difference in gene expression level at baseline between the 16 sensitive cell lines and the 12 resistant cell lines as determined by IC<sub>50</sub> with the cut off 0.3 μM. The cell lines with IC<sub>50</sub> below 0.3 μM are defined as sensitive whereas the cell lines with IC<sub>50</sub> above 0.3 μM are defined as resistant to the IGF-1R inhibitor BMS-536924.
2. Pearson correlations between the expression level of each gene and the log<sub>2</sub>(IC<sub>50</sub>) data in the 28 cell lines

**Supplemental Table 2:** The proteins correlated with the sensitivity of 26 sarcoma cell lines to IGF1R inhibitor BMS-536924 as identified by LC/MS based “label free” protein profiling. The peptide ions were selected by the overlaps between the two statistic analyses: t-test ( $p < 0.001$  between 14 sensitive cell lines and 12 resistant cell lines) and the Pearson correlations between the log<sub>2</sub> (IC<sub>50</sub>) data and the expression level of each peptide ion in the 26 cell lines ( $p < 0.001$ ). The peptide ions generated from statistical analyses were sequenced by tandem mass spectrometry to get the identification of the proteins which are listed in this Table. The name of protein and gene, the sequence of each peptide ion associated with identified protein, the p values and fold change between the sensitive and resistant cell line groups for each peptide ion are listed. The positive fold changes indicate the peptide ions having higher expression level in the sensitive cell lines and the negative fold changes indicate the peptide ions having higher expression level in the resistant cell lines. The overlap with Affymetrix gene expression results (Supplemental Table 1) is also indicated.

| Protein name                               | Swiss-protein ID | Gene name | Identified by microarray <sup>1</sup> | Peptide sequence         | p-value in t-test | Fold change (S/R) <sup>2</sup> | p-value (correlation) <sup>3</sup> |
|--------------------------------------------|------------------|-----------|---------------------------------------|--------------------------|-------------------|--------------------------------|------------------------------------|
| Creatine Kinase, brain                     |                  | CKB       | Yes                                   | FCTGLTQIETLFK            | 5.36E-11          | 12.6                           | 2.62E-06                           |
|                                            |                  |           |                                       | KENPLQFKFR               | 3.92E-05          | 12.0                           | 2.84E-04                           |
| thymoprotein                               |                  | TMPO      |                                       | YGVNPGPIVGTTR            | 1.22E-04          | 4.0                            | 9.62E-07                           |
| Stathmin                                   | P16949           | STMN1     | Yes                                   | DLSLEEIQK                | 4.40E-08          | 3.9                            | 2.13E-09                           |
| heterogeneous nuclear ribonucleoprotein A1 | P09651           | HNRPA1    | Yes                                   | NQGGYGGSSSSSSYGSGR       | 8.49E-07          | 3.7                            | 1.97E-09                           |
|                                            |                  |           |                                       | YQLLQLVEPFGVISNHLILNK    | 3.17E-05          | 3.7                            | 2.95E-07                           |
| high mobility protein 2                    | P26583           | HMGB2     | Yes                                   | LGEMWSEQSAK              | 2.83E-04          | 3.5                            | 9.73E-05                           |
| Radixin                                    | P35241           | RDX       |                                       | KALELDQER                | 4.10E-05          | 3.4                            | 2.25E-05                           |
| high mobility protein 1                    |                  | HMGB1     |                                       | KHPDASVNFSEFSK           | 2.48E-04          | 3.4                            | 5.48E-06                           |
|                                            |                  |           |                                       | DLSAAGIGLLAAATQSLSPASLGR | 6.06E-05          | 3.2                            | 7.10E-06                           |
| matrin 3                                   |                  | MATR3     | Yes                                   | MKSQAFIEMETR             | 6.29E-05          | 3.1                            | 1.56E-07                           |
|                                            |                  |           |                                       | MSSYAFFVQTCR             | 2.38E-04          | 3.0                            | 7.44E-04                           |
|                                            |                  |           |                                       | EDSQRPGAHLTVK            | 4.38E-04          | 2.9                            | 3.83E-06                           |
|                                            |                  |           |                                       | HVNPVQALSEFK             | 5.47E-05          | 2.8                            | 6.60E-06                           |
|                                            |                  |           |                                       | AAMRETWLSNQQR            | 7.89E-04          | 2.8                            | 1.09E-05                           |

|                                                                     |        |           |     |                     |          |     |          |
|---------------------------------------------------------------------|--------|-----------|-----|---------------------|----------|-----|----------|
| spectrin, beta                                                      |        | SPTBN2    |     | ALAVEGK             | 1.70E-04 | 2.7 | 7.41E-04 |
|                                                                     |        |           |     | YANVIAYDHSR         | 2.12E-05 | 2.7 | 4.50E-07 |
| lactate dehydrogenase                                               |        | LDHB      |     | IVVVTAGVR           | 3.87E-04 | 2.7 | 9.45E-05 |
|                                                                     |        |           |     | ESYSVYVYK           | 7.20E-07 | 2.7 | 2.18E-04 |
|                                                                     |        |           |     | TSPVEGLSGNPADLEK    | 7.54E-04 | 2.6 | 4.78E-07 |
| Plasma membrane calcium-transporting ATPase 4                       | P23634 | ATP2B4    |     | SMSTVIRNPNGGFR      | 2.00E-04 | 2.6 | 9.64E-06 |
| catenin                                                             |        | CTNNA1    | Yes | TLAVER              | 1.10E-04 | 2.3 | 8.49E-04 |
| poly rC binding protein                                             |        | PCBP2     | Yes | IITLTGPTNAIFK       | 5.71E-05 | 2.2 | 5.00E-07 |
|                                                                     |        |           |     | DAVYTEHAK           | 3.31E-04 | 2.2 | 3.69E-04 |
|                                                                     |        |           |     | PADGILIQNDLK        | 2.45E-04 | 2.2 | 9.34E-04 |
| histone 3                                                           |        | H3F3B     | Yes | EIAQDFK             | 5.14E-05 | 2.2 | 4.54E-04 |
| protein tyrosine phosphatase, receptor type, F                      |        | PTPRF     |     | TFALHK              | 9.87E-04 | 2.1 | 5.40E-04 |
| KH domain containing, RNA binding, signal transduction associated 1 | Q07666 | KHDRBS1   | Yes | DSLDPSTHAMQLLTAEIEK | 8.62E-04 | 2.1 | 2.35E-04 |
| heterogeneous nuclear ribonucleoprotein M                           |        | HRNPM     | Yes | AFITNIPFDVK         | 6.65E-04 | 2.1 | 4.00E-05 |
| histone 3                                                           |        | HIST3H3   | Yes | YRPGTVALR           | 6.96E-05 | 2.0 | 2.70E-04 |
| heterogeneous nuclear ribonucleoprotein D                           | Q14103 | HNRPD     | Yes | IFVGGLSPDTPEEK      | 6.39E-06 | 1.9 | 5.09E-05 |
|                                                                     |        |           |     | MFIGGLSWDTTK        | 1.25E-04 | 1.9 | 5.40E-04 |
| tublin, alpha                                                       |        | NP_006073 |     | FDLMYAK             | 1.37E-04 | 1.9 | 1.58E-04 |
| heterogeneous nuclear ribonucleoprotein A2                          |        | HNRPA2    | Yes | IDTIEIITDR          | 4.59E-04 | 1.9 | 2.33E-04 |
| histone 2                                                           |        | H2AFY2    | Yes | EIQTAVR             | 3.44E-05 | 1.9 | 8.41E-04 |
| heterogeneous nuclear ribonucleoprotein                             | P22626 | HNRPA2    | Yes | GFGFVTFDDHDPVVK     | 8.04E-05 | 1.9 | 6.93E-05 |
| splicing factor proline/glutamine rich                              |        | SFPQ      |     | LFVGNLPADITEDEFKR   | 8.88E-04 | 1.9 | 2.85E-05 |
| histone H2B                                                         |        | NP_00351  | Yes | AMGIMNSFVNDIFER     | 1.49E-04 | 1.9 | 1.30E-04 |
| heterogeneous nuclear ribonucleoprotein                             |        | HNRPA3    | Yes | LTDCVVMR            | 1.98E-04 | 1.8 | 1.69E-04 |
|                                                                     |        |           |     | GFGFVLFK            | 5.18E-05 | 1.8 | 1.95E-04 |
| histone 1                                                           |        | HIST1H4I  |     | TLYGFGG             | 3.54E-04 | 1.8 | 2.90E-04 |
| heat shock protein 60                                               |        | CPN60     |     | VGEVIVTK            | 1.41E-04 | 1.8 | 2.12E-04 |
| cleavage and polyadenylation specific factor 1                      | Q10570 | CPSF1     | Yes | MYAVYK              | 1.98E-04 | 1.7 | 8.49E-04 |
| ATP synthase, H <sup>+</sup> transporting, mitochondrial F1 complex | Q9Y653 | ATP5G     | Yes | TIAMDGTEGLVR        | 9.36E-04 | 1.6 | 1.40E-04 |
| heterogeneous nuclear ribonucleoprotein K                           |        | HRNPK     | Yes | IILDISESPIK         | 7.40E-04 | 1.6 | 3.85E-05 |
| peroxiredoxin                                                       |        | PRDX6     | Yes | LPPFIIDDR           | 1.72E-04 | 1.5 | 1.41E-05 |

|                                  |        |        |     |                     |          |      |          |
|----------------------------------|--------|--------|-----|---------------------|----------|------|----------|
|                                  |        |        |     | LQQELDDLLVLDLHQQR   | 5.51E-04 | -2.3 | 8.39E-04 |
| myosin light chain 6             | O00159 | MYL6   | Yes | HVLVTLGEEK          | 1.47E-04 | -2.3 | 3.82E-04 |
|                                  |        |        |     | VLDFEHFLPMLQTVAK    | 8.48E-07 | -2.7 | 9.65E-04 |
| destrin                          | P60981 | DSTN   | Yes | YALYDASFETK         | 5.35E-07 | -2.7 | 2.64E-05 |
|                                  |        |        |     | IGFSGPKLEGGEVDLKGPK | 5.74E-05 | -2.7 | 1.21E-06 |
| myosin heavy chain 9             |        | MYH9   | Yes | VVFQEFR             | 2.27E-04 | -3.0 | 3.26E-04 |
| actinin, alpha                   | O43707 | ACTN4  | Yes | DYETATLSDIK         | 3.05E-06 | -3.0 | 6.40E-05 |
| calpain                          |        | CAPN2  |     | SMVAVMDSDTTGK       | 1.00E-05 | -3.1 | 5.44E-05 |
|                                  |        |        |     | ELLTTMGDR           | 2.54E-04 | -3.3 | 8.89E-04 |
|                                  |        |        |     | SNTENLSQHFR         | 9.37E-08 | -3.6 | 2.76E-08 |
|                                  |        |        |     | DGFIDKEDLHDMLASLGK  | 5.20E-07 | -3.6 | 1.74E-05 |
|                                  |        |        |     | EAFQLFDR            | 3.53E-07 | -3.7 | 5.83E-06 |
|                                  |        |        |     | FAIQDISVEETSAAK     | 6.22E-05 | -3.7 | 8.97E-08 |
|                                  |        |        |     | ISMFDIDLNLK         | 1.33E-06 | -3.9 | 1.99E-04 |
| AHNAK nucleoprotein              | Q09666 | AHNAK  | Yes | VPGIDATTK           | 4.66E-06 | -4.0 | 7.91E-04 |
| LIM domain and actin binding     | Q9UHB6 | LIMA1  |     | YPHIKDGEDLK         | 1.92E-05 | -4.0 | 5.51E-05 |
| chloride intracellular protein 1 | O00299 | CLIC1  | Yes | GVTFNVTVDTK         | 1.38E-08 | -4.0 | 4.77E-06 |
|                                  |        |        |     | GEGPEVDVNLPK        | 1.90E-05 | -4.3 | 2.23E-04 |
| filamin B                        |        | FLNB   | Yes | GDYVLAVK            | 2.41E-06 | -4.5 | 4.80E-06 |
|                                  |        |        |     | ISMPDFDLHLK         | 3.28E-05 | -4.7 | 3.22E-04 |
|                                  |        |        |     | TINEVENQILTR        | 3.51E-08 | -4.7 | 3.53E-07 |
| actinin, alpha                   | P12814 | ACTN1  | Yes | VGWEQLLTTIAR        | 8.55E-10 | -4.8 | 1.09E-06 |
|                                  |        |        |     | IAEFTTNLTETEEK      | 1.89E-06 | -5.0 | 1.86E-05 |
|                                  |        |        |     | FSMPGFK             | 6.72E-06 | -5.2 | 1.71E-04 |
| myoferlin                        | Q9NZM1 | FER1L3 | Yes | VGETIIDLENR         | 4.52E-05 | -5.3 | 7.00E-04 |
|                                  |        |        |     | VISGVLQLGNIVFK      | 3.87E-05 | -5.5 | 3.72E-05 |
|                                  |        |        |     | LDPHLVLDQLR         | 5.41E-06 | -5.5 | 1.68E-04 |
| Syntaxin                         | O15400 | STX7   | Yes | TLNQLGTPQDSPELR     | 7.85E-07 | -5.6 | 5.27E-04 |

1. Also identified by gene expression profiling as listed in Supplemental Table 1.
2. Fold difference in gene expression level at baseline between the 14 sensitive cell lines and the 12 resistant cell lines as determined by IC<sub>50</sub> with the cut off is 0.3  $\mu$ M. The cell lines with IC<sub>50</sub> below 0.3  $\mu$ M are defined as sensitive whereas the cell lines with IC<sub>50</sub> above 0.3  $\mu$ M are defined as resistant to the IGF-1R inhibitor BMS-536924.
3. Pearson correlations between the expression level of each gene and the log<sub>2</sub>(IC<sub>50</sub>) data in the 26 cell lines.

**Supplemental Table 3:** Common genes correlated with both the primary resistance and the acquired resistance to IGF-1R inhibitor BMS-536924.

| Gene                                                                                             | Gene Symbol | Fold in primary resistant vs. sensitive <sup>1</sup> | Fold in acquired resistant vs. sensitive <sup>2</sup> |
|--------------------------------------------------------------------------------------------------|-------------|------------------------------------------------------|-------------------------------------------------------|
| calpastatin                                                                                      | CAST        | 3.6                                                  | 2.5                                                   |
| CD44 molecule (Indian blood group)                                                               | CD44        | 38.7                                                 | 2                                                     |
| CD55 molecule, decay accelerating factor for complement (Cromer blood group)                     | CD55        | 6.5                                                  | 6.1                                                   |
| cystatin C (amyloid angiopathy and cerebral hemorrhage)                                          | CST3        | 2.4                                                  | 3                                                     |
| discoidin, CUB and LCCL domain containing 2                                                      | DCBLD2      | 7.4                                                  | 11.3                                                  |
| Desmoglein 2                                                                                     | DSG2        | 30.2                                                 | 13.9                                                  |
| ethylmalonic encephalopathy 1                                                                    | ETHE1       | 2.9                                                  | 2                                                     |
| FOS-like antigen 2                                                                               | FOSL2       | 2.2                                                  | 2.1                                                   |
| FXFD domain containing ion transport regulator 5                                                 | FXFD5       | 7.6                                                  | 2                                                     |
| glutamate decarboxylase 1 (brain, 67kDa)/ LAG1 homolog, ceramide synthase 6 (S. cerevisiae)      | GAD1/ LASS6 | 2.4                                                  | 6.5                                                   |
| UDP-N-acetyl-alpha-D-galactosamine:polypeptide N-acetylgalactosaminyltransferase 10 (GalNAc-T10) | GALNT10     | 3.2                                                  | 2.5                                                   |
| glutamine-fructose-6-phosphate transaminase 2                                                    | GFPT2       | 7.1                                                  | 4.6                                                   |
| G protein-coupled receptor, family C, group 5, member A                                          | GPRC5A      | 20.7                                                 | 3                                                     |
| hippocalcin-like 1                                                                               | HPCAL1      | 3.1                                                  | 2.8                                                   |
| immediate early response 3                                                                       | IER3        | 9.3                                                  | 3.2                                                   |
| interleukin 13 receptor, alpha 1                                                                 | IL13RA1     | 5.7                                                  | 2.1                                                   |
| keratin 18                                                                                       | KRT18       | 33.3                                                 | 2.1                                                   |
| lysosomal-associated membrane protein 2                                                          | LAMP2       | 4.5                                                  | 2.3                                                   |
| lectin, galactoside-binding, soluble, 3 (galectin 3)                                             | LGALS3      | 13.1                                                 | 2.3                                                   |
| latent transforming growth factor beta binding protein 2                                         | LTBP2       | 3.1                                                  | 2.5                                                   |
| major vault protein                                                                              | MVP         | 4.7                                                  | 2                                                     |
| Niemann-Pick disease, type C2                                                                    | NPC2        | 3.7                                                  | 2                                                     |

|                                                                        |          |      |     |
|------------------------------------------------------------------------|----------|------|-----|
| 5'-nucleotidase, ecto (CD73)                                           | NT5E     | 4.6  | 3.2 |
| pleckstrin homology-like domain, family A, member 2                    | PHLDA2   | 23.2 | 2   |
| plasminogen activator, urokinase receptor                              | PLAUR    | 5.8  | 2.3 |
| regulator of G-protein signalling 20                                   | RGS20    | 6.3  | 2   |
| Ras and Rab interactor 3                                               | RIN3     | 2.6  | 2.6 |
| solute carrier family 16, member 3 (monocarboxylic acid transporter 4) | SLC16A3  | 25.5 | 2.1 |
| solute carrier family 22 (organic cation transporter), member 18       | SLC22A18 | 4.5  | 2.8 |
| solute carrier family 2 (facilitated glucose transporter), member 3    | SLC2A3   | 6.2  | 2   |
| SP100 nuclear antigen                                                  | SP100    | 6.7  | 2   |
| TAO kinase 3                                                           | TAOK3    | 2.3  | 2   |
| tissue factor pathway inhibitor 2                                      | TFPI2    | 15.7 | 194 |
| thrombospondin 1                                                       | THBS1    | 17.5 | 6.1 |
| transmembrane 4 L six family member 1                                  | TM4SF1   | 25.1 | 6.1 |
| vitamin D (1,25- dihydroxyvitamin D3) receptor                         | VDR      | 4.2  | 2.6 |

<sup>1</sup>. Fold difference in gene expression level at baseline between the 12 resistant cell lines and 16 sensitive cell lines as determined by IC<sub>50</sub> with the cut off 0.35 µM.

<sup>2</sup>. Fold difference in gene expression level between acquired resistant RD-1<sup>R</sup> cells (IC<sub>50</sub>=2.0µM) and the sensitive parental RD-1<sup>S</sup> (IC<sub>50</sub>=0.238µM) cells



**Supplemental Table 4:** Global pathway analyses. RMA normalized baseline gene expression data from 28 cell lines were first filtered (Max>5 and CV>3%) down to 17276 probe sets. The global pathway analysis was performed on the filtered data using Bioconductor's *globaltest* package (Geoman J, Oosting J. Testing association of a pathway with a clinical variable. Version 4.4.0.) against a collection of 182 KEGG pathways to compare sensitive and resistant cell lines groups and identify pathways that were different between two groups and may contribute to the sensitivity of cells to BMS-536924. For Rh41 drug treatment studies, expression datasets were first filtered to remove probe sets with Max<5, which resulted in 9269 probe sets. The *Globaltest* was also performed on expression data for the BMS-536924 treated Rh41 cells compared to that for the untreated control cells to identify pathways that were modulated by BMS-536924 treatment. The p-value, indicating the association between expression values and resistant/sensitive classifications, as well as its multiplicity-adjusted version, FWER (Holm's method), were reported for each pathway.

| Pathway                                                    | Basal expression (sensitive vs. resistant) |                                |             |            |         |         |                                    | Modulated by drug treatment (drug treated vs control) |             |            |         |         |                                    |
|------------------------------------------------------------|--------------------------------------------|--------------------------------|-------------|------------|---------|---------|------------------------------------|-------------------------------------------------------|-------------|------------|---------|---------|------------------------------------|
|                                                            | # of Genes <sup>1</sup>                    | # of Genes Tested <sup>2</sup> | Statistic Q | Expected Q | sd of Q | p-value | FWER adjusted p-value <sup>3</sup> | Tested <sup>2</sup>                                   | Statistic Q | Expected Q | sd of Q | p-value | FWER adjusted p-value <sup>3</sup> |
| Circadian rhythm                                           | 36                                         | 32                             | 100.23      | 9.13       | 6.79    | 3.7E-06 | 0.0007                             | 17                                                    | 33.03       | 10.81      | 8.57    | 0.0271  | 1.0000                             |
| Epithelial cell signaling in Helicobacter pylori infection | 128                                        | 113                            | 103.05      | 11.87      | 7.23    | 3.9E-06 | 0.0007                             | 64                                                    | 38.84       | 10.79      | 7.33    | 0.0077  | 0.8214                             |
| Atrazine degradation                                       | 10                                         | 8                              | 268.20      | 19.62      | 18.76   | 4.7E-06 | 0.0009                             | 2                                                     | 5.80        | 3.90       | 4.16    | 0.2210  | 1.0000                             |
| ECM-receptor interaction                                   | 191                                        | 146                            | 209.61      | 26.49      | 15.82   | 4.9E-06 | 0.0009                             | 66                                                    | 50.34       | 15.42      | 10.80   | 0.0129  | 1.0000                             |
| Cysteine metabolism                                        | 28                                         | 23                             | 70.91       | 8.33       | 5.23    | 5.7E-06 | 0.0010                             | 11                                                    | 35.04       | 8.27       | 6.12    | 0.0039  | 0.5373                             |
| Hematopoietic cell lineage                                 | 176                                        | 108                            | 237.83      | 25.20      | 17.91   | 6.3E-06 | 0.0011                             | 29                                                    | 35.88       | 12.70      | 9.27    | 0.0284  | 1.0000                             |
| Adherens junction                                          | 190                                        | 150                            | 81.13       | 11.75      | 6.33    | 6.9E-06 | 0.0012                             | 99                                                    | 69.89       | 13.20      | 9.99    | 0.0018  | 0.3078                             |
| Cytokine-cytokine receptor interaction                     | 386                                        | 252                            | 100.83      | 14.61      | 7.52    | 8.6E-06 | 0.0015                             | 63                                                    | 54.63       | 11.41      | 7.96    | 0.0021  | 0.3418                             |
| Valine, leucine and isoleucine degradation                 | 91                                         | 81                             | 77.65       | 11.00      | 6.30    | 1.1E-05 | 0.0019                             | 60                                                    | 41.43       | 9.10       | 6.13    | 0.0020  | 0.3297                             |
| Keratan sulfate biosynthesis                               | 22                                         | 20                             | 73.74       | 7.57       | 5.61    | 1.3E-05 | 0.0023                             | 9                                                     | 40.67       | 8.58       | 6.81    | 0.0037  | 0.5116                             |
| Neurodegenerative Disorders                                | 74                                         | 60                             | 130.45      | 18.64      | 10.93   | 1.4E-05 | 0.0024                             | 37                                                    | 39.06       | 11.32      | 8.34    | 0.0138  | 1.0000                             |
| Aminosugars metabolism                                     | 39                                         | 34                             | 45.05       | 7.25       | 3.82    | 1.7E-05 | 0.0030                             | 21                                                    | 20.49       | 9.21       | 6.12    | 0.0553  | 1.0000                             |
| Complement and coagulation cascades                        | 102                                        | 66                             | 201.63      | 24.78      | 15.98   | 1.8E-05 | 0.0031                             | 18                                                    | 53.72       | 13.72      | 10.02   | 0.0061  | 0.7042                             |

|                                            |     |     |        |       |       |         |        |     |        |       |       |        |        |
|--------------------------------------------|-----|-----|--------|-------|-------|---------|--------|-----|--------|-------|-------|--------|--------|
| Toll-like receptor signaling pathway       | 147 | 115 | 66.20  | 10.26 | 5.60  | 1.9E-05 | 0.0032 | 46  | 60.69  | 11.87 | 9.54  | 0.0033 | 0.4772 |
| Huntington's disease                       | 69  | 52  | 115.29 | 13.77 | 9.41  | 2.0E-05 | 0.0034 | 37  | 46.56  | 9.50  | 7.09  | 0.0023 | 0.3694 |
| MAPK signaling pathway                     | 518 | 437 | 60.21  | 11.26 | 5.36  | 2.2E-05 | 0.0037 | 190 | 54.71  | 11.76 | 8.47  | 0.0028 | 0.4270 |
| Arginine and proline metabolism            | 75  | 62  | 122.94 | 21.14 | 11.15 | 2.3E-05 | 0.0038 | 35  | 48.21  | 11.56 | 8.17  | 0.0039 | 0.5390 |
| Leukocyte transendothelial migration       | 217 | 159 | 87.38  | 16.54 | 8.21  | 2.4E-05 | 0.0040 | 83  | 39.16  | 9.69  | 6.49  | 0.0038 | 0.5258 |
| Basal transcription factors                | 48  | 43  | 19.31  | 3.54  | 1.73  | 2.6E-05 | 0.0042 | 27  | 25.58  | 7.12  | 4.87  | 0.0077 | 0.8214 |
| Colorectal cancer                          | 146 | 131 | 87.28  | 14.96 | 8.09  | 2.6E-05 | 0.0043 | 68  | 78.27  | 15.73 | 11.64 | 0.0020 | 0.3297 |
| Cell Communication                         | 200 | 138 | 148.96 | 26.53 | 14.05 | 2.8E-05 | 0.0045 | 69  | 37.62  | 10.59 | 7.32  | 0.0078 | 0.8214 |
| Nicotinate and nicotinamide metabolism     | 50  | 43  | 178.71 | 22.29 | 15.37 | 3.4E-05 | 0.0055 | 17  | 33.37  | 12.81 | 9.43  | 0.0397 | 1.0000 |
| Pyrimidine metabolism                      | 110 | 100 | 45.16  | 7.07  | 3.89  | 3.4E-05 | 0.0055 | 71  | 51.52  | 10.43 | 7.68  | 0.0020 | 0.3297 |
| Regulation of actin cytoskeleton           | 376 | 306 | 55.40  | 11.50 | 5.37  | 3.5E-05 | 0.0056 | 160 | 50.86  | 10.55 | 7.63  | 0.0023 | 0.3631 |
| Biosynthesis of steroids                   | 33  | 32  | 123.05 | 11.59 | 10.25 | 3.7E-05 | 0.0059 | 23  | 180.94 | 23.37 | 23.27 | 0.0010 | 0.1805 |
| Glutathione metabolism                     | 47  | 43  | 99.79  | 15.45 | 8.91  | 3.8E-05 | 0.0060 | 28  | 38.61  | 9.08  | 6.45  | 0.0045 | 0.5905 |
| Ubiquitin mediated proteolysis             | 83  | 71  | 31.66  | 5.56  | 2.90  | 3.9E-05 | 0.0061 | 54  | 25.48  | 8.40  | 5.64  | 0.0168 | 1.0000 |
| Vitamin B6 metabolism                      | 14  | 13  | 177.14 | 14.99 | 14.74 | 3.9E-05 | 0.0061 | 7   | 57.41  | 13.80 | 11.17 | 0.0076 | 0.8214 |
| Butanoate metabolism                       | 67  | 59  | 65.53  | 11.17 | 6.25  | 4.3E-05 | 0.0066 | 44  | 30.97  | 8.84  | 5.68  | 0.0060 | 0.7004 |
| Dorso-ventral axis formation               | 49  | 43  | 57.93  | 8.56  | 5.56  | 4.6E-05 | 0.0071 | 19  | 20.69  | 7.53  | 5.47  | 0.0317 | 1.0000 |
| RNA polymerase                             | 30  | 27  | 20.95  | 3.76  | 2.04  | 4.6E-05 | 0.0071 | 24  | 51.66  | 9.37  | 7.50  | 0.0019 | 0.3201 |
| Focal adhesion                             | 413 | 329 | 90.03  | 18.90 | 9.16  | 4.9E-05 | 0.0074 | 175 | 60.45  | 13.20 | 9.50  | 0.0027 | 0.4130 |
| Methionine metabolism                      | 22  | 20  | 48.85  | 6.28  | 4.37  | 5.5E-05 | 0.0083 | 13  | 94.02  | 16.38 | 15.58 | 0.0040 | 0.5438 |
| TGF-beta signaling pathway                 | 144 | 121 | 94.72  | 14.97 | 8.55  | 5.5E-05 | 0.0083 | 48  | 50.26  | 11.80 | 8.12  | 0.0032 | 0.4666 |
| Propanoate metabolism                      | 61  | 55  | 70.03  | 12.46 | 6.98  | 5.6E-05 | 0.0084 | 36  | 91.01  | 14.28 | 12.37 | 0.0014 | 0.2444 |
| Axon guidance                              | 225 | 183 | 56.69  | 11.59 | 5.49  | 6.0E-05 | 0.0089 | 100 | 34.25  | 10.39 | 6.79  | 0.0102 | 0.9094 |
| Reductive carboxylate cycle (CO2 fixation) | 16  | 15  | 50.54  | 6.69  | 4.86  | 7.2E-05 | 0.0106 | 14  | 100.13 | 13.69 | 13.07 | 0.0010 | 0.1867 |
| ATP synthesis                              | 60  | 44  | 27.79  | 4.21  | 2.54  | 7.4E-05 | 0.0108 | 43  | 27.03  | 7.17  | 5.46  | 0.0106 | 0.9094 |
| beta-Alanine metabolism                    | 43  | 35  | 93.68  | 14.82 | 9.51  | 7.7E-05 | 0.0112 | 19  | 38.99  | 8.30  | 5.88  | 0.0022 | 0.3572 |
| Glutamate metabolism                       | 52  | 48  | 73.12  | 10.67 | 6.98  | 8.7E-05 | 0.0125 | 30  | 30.05  | 10.54 | 6.81  | 0.0182 | 1.0000 |
| Glycan structures - biosynthesis 1         | 129 | 115 | 45.14  | 9.39  | 4.57  | 8.8E-05 | 0.0126 | 64  | 31.48  | 8.93  | 6.14  | 0.0089 | 0.8789 |
| Prion disease                              | 20  | 15  | 76.27  | 9.52  | 7.48  | 9.0E-05 | 0.0127 | 10  | 32.79  | 8.99  | 7.19  | 0.0136 | 1.0000 |
| Taurine and hypotaurine metabolism         | 16  | 13  | 42.07  | 4.84  | 4.01  | 9.2E-05 | 0.0130 | 4   | 6.78   | 4.95  | 4.72  | 0.2379 | 1.0000 |
| Tryptophan metabolism                      | 129 | 108 | 72.49  | 13.66 | 7.56  | 9.3E-05 | 0.0130 | 58  | 64.19  | 10.93 | 8.77  | 0.0015 | 0.2559 |
| Jak-STAT signaling pathway                 | 246 | 170 | 58.41  | 11.75 | 6.01  | 9.6E-05 | 0.0133 | 52  | 36.39  | 11.59 | 7.65  | 0.0128 | 1.0000 |
| Tyrosine metabolism                        | 93  | 64  | 87.56  | 15.78 | 9.51  | 0.0001  | 0.0154 | 35  | 23.63  | 7.55  | 4.79  | 0.0104 | 0.9094 |
| Lysine degradation                         | 69  | 63  | 53.50  | 9.83  | 5.50  | 0.0001  | 0.0155 | 42  | 39.49  | 10.64 | 8.03  | 0.0111 | 0.9294 |
| Terpenoid biosynthesis                     | 12  | 12  | 72.25  | 7.05  | 6.89  | 0.0001  | 0.0157 | 8   | 308.49 | 30.60 | 37.64 | 0.0007 | 0.1291 |
| GnRH signaling pathway                     | 209 | 169 | 46.08  | 9.08  | 4.81  | 0.0001  | 0.0174 | 81  | 44.05  | 10.10 | 7.08  | 0.0033 | 0.4772 |

|                                                       |     |     |        |       |       |        |        |     |       |       |      |        |        |
|-------------------------------------------------------|-----|-----|--------|-------|-------|--------|--------|-----|-------|-------|------|--------|--------|
| Dentatorubropallidolusian atrophy (DRPLA)             | 44  | 32  | 106.23 | 12.11 | 10.20 | 0.0001 | 0.0175 | 16  | 13.63 | 6.83  | 5.12 | 0.0955 | 1.0000 |
| Fatty acid elongation in mitochondria                 | 17  | 17  | 18.47  | 3.14  | 1.95  | 0.0002 | 0.0201 | 16  | 14.40 | 5.70  | 3.75 | 0.0333 | 1.0000 |
| Sphingolipid metabolism                               | 57  | 49  | 57.93  | 11.78 | 6.31  | 0.0002 | 0.0205 | 24  | 23.09 | 9.11  | 6.10 | 0.0346 | 1.0000 |
| Insulin signaling pathway                             | 245 | 205 | 24.32  | 6.52  | 2.78  | 0.0002 | 0.0251 | 104 | 44.97 | 10.80 | 7.86 | 0.0052 | 0.6653 |
| Glycosylphosphatidylinositol(GPI)-anchor biosynthesis | 37  | 32  | 20.60  | 4.31  | 2.36  | 0.0002 | 0.0251 | 14  | 47.73 | 12.21 | 9.44 | 0.0087 | 0.8747 |
| Selenoamino acid metabolism                           | 53  | 48  | 47.63  | 6.83  | 4.80  | 0.0002 | 0.0251 | 29  | 54.82 | 10.97 | 8.43 | 0.0027 | 0.4094 |
| Citrate cycle (TCA cycle)                             | 42  | 39  | 38.08  | 6.03  | 3.91  | 0.0002 | 0.0262 | 33  | 58.13 | 11.10 | 8.85 | 0.0023 | 0.3677 |
| Apoptosis                                             | 162 | 141 | 44.52  | 9.59  | 4.81  | 0.0002 | 0.0285 | 55  | 35.81 | 9.77  | 6.35 | 0.0057 | 0.6958 |
| Cell adhesion molecules (CAMs)                        | 251 | 183 | 94.01  | 20.89 | 10.55 | 0.0002 | 0.0297 | 68  | 37.04 | 11.59 | 7.29 | 0.0095 | 0.8805 |
| Oxidative phosphorylation                             | 157 | 120 | 14.45  | 3.62  | 1.62  | 0.0002 | 0.0301 | 128 | 25.31 | 6.64  | 4.57 | 0.0058 | 0.6958 |
| VEGF signaling pathway                                | 136 | 115 | 48.21  | 10.28 | 5.49  | 0.0003 | 0.0324 | 58  | 25.63 | 9.22  | 6.05 | 0.0221 | 1.0000 |
| Glycerolipid metabolism                               | 78  | 59  | 55.93  | 12.25 | 6.37  | 0.0003 | 0.0334 | 28  | 31.31 | 9.64  | 6.87 | 0.0154 | 1.0000 |
| Natural killer cell mediated cytotoxicity             | 227 | 168 | 64.33  | 11.69 | 7.00  | 0.0003 | 0.0334 | 75  | 21.93 | 8.52  | 4.99 | 0.0215 | 1.0000 |
| Glycosaminoglycan degradation                         | 33  | 23  | 42.89  | 7.00  | 4.92  | 0.0003 | 0.0345 | 13  | 17.59 | 9.66  | 7.59 | 0.1298 | 1.0000 |
| Fatty acid metabolism                                 | 83  | 63  | 40.55  | 8.84  | 4.58  | 0.0003 | 0.0351 | 44  | 25.72 | 8.17  | 5.00 | 0.0089 | 0.8789 |
| Adipocytokine signaling pathway                       | 125 | 101 | 32.68  | 7.96  | 3.88  | 0.0003 | 0.0375 | 42  | 31.46 | 9.29  | 6.14 | 0.0094 | 0.8805 |
| Hedgehog signaling pathway                            | 75  | 57  | 64.22  | 10.43 | 7.11  | 0.0003 | 0.0375 | 31  | 30.03 | 11.71 | 8.51 | 0.0409 | 1.0000 |
| Tight junction                                        | 217 | 171 | 56.28  | 13.29 | 6.70  | 0.0003 | 0.0377 | 99  | 34.88 | 9.77  | 6.58 | 0.0071 | 0.7968 |
| Styrene degradation                                   | 7   | 2   | 116.58 | 11.96 | 13.24 | 0.0004 | 0.0409 | 1   | 1.06  | 4.41  | 6.23 | 0.6232 | 1.0000 |
| Fc epsilon RI signaling pathway                       | 136 | 111 | 47.07  | 10.39 | 5.65  | 0.0004 | 0.0459 | 39  | 29.69 | 8.25  | 5.53 | 0.0071 | 0.7968 |
| Taste transduction                                    | 54  | 39  | 34.05  | 5.95  | 3.92  | 0.0004 | 0.0461 | 18  | 27.41 | 7.14  | 5.11 | 0.0072 | 0.7969 |
| Alanine and aspartate metabolism                      | 42  | 36  | 76.85  | 11.98 | 8.88  | 0.0004 | 0.0484 | 27  | 35.08 | 8.19  | 5.89 | 0.0040 | 0.5438 |
| Purine metabolism                                     | 219 | 179 | 30.10  | 8.26  | 3.68  | 0.0004 | 0.0484 | 106 | 45.39 | 9.62  | 6.80 | 0.0021 | 0.3438 |
| Pathogenic Escherichia coli infection - EHEC          | 109 | 70  | 79.15  | 16.00 | 9.26  | 0.0004 | 0.0490 | 72  | 51.54 | 10.37 | 7.70 | 0.0020 | 0.3297 |
| Pathogenic Escherichia coli infection - EPEC          | 109 | 70  | 79.15  | 16.00 | 9.26  | 0.0004 | 0.0490 | 72  | 51.54 | 10.37 | 7.70 | 0.0020 | 0.3297 |
| Glycerophospholipid metabolism                        | 111 | 91  | 27.87  | 7.09  | 3.44  | 0.0005 | 0.0497 | 50  | 33.33 | 10.61 | 7.86 | 0.0209 | 1.0000 |
| Cell cycle                                            | 206 | 182 | 47.25  | 11.25 | 5.80  | 0.0005 | 0.0510 | 123 | 41.25 | 12.56 | 8.53 | 0.0112 | 0.9294 |
| mTOR signaling pathway                                | 91  | 76  | 31.91  | 8.09  | 4.02  | 0.0005 | 0.0559 | 41  | 35.80 | 9.59  | 6.82 | 0.0075 | 0.8214 |
| ABC transporters - General                            | 63  | 42  | 48.76  | 11.45 | 6.25  | 0.0005 | 0.0580 | 10  | 15.58 | 9.84  | 7.55 | 0.1681 | 1.0000 |
| Benzoate degradation via CoA ligation                 | 49  | 41  | 47.74  | 9.58  | 5.87  | 0.0006 | 0.0595 | 28  | 40.22 | 10.38 | 7.20 | 0.0055 | 0.6894 |
| O-Glycan biosynthesis                                 | 23  | 20  | 83.53  | 16.15 | 10.74 | 0.0007 | 0.0686 | 7   | 27.29 | 9.14  | 8.74 | 0.0458 | 1.0000 |
| Galactose metabolism                                  | 38  | 33  | 30.35  | 7.83  | 4.05  | 0.0007 | 0.0718 | 20  | 36.77 | 10.09 | 7.38 | 0.0101 | 0.9094 |
| Parkinson's disease                                   | 29  | 21  | 96.76  | 18.74 | 12.94 | 0.0007 | 0.0721 | 18  | 20.06 | 7.42  | 4.62 | 0.0201 | 1.0000 |
| Olfactory transduction                                | 61  | 49  | 21.05  | 5.50  | 2.75  | 0.0007 | 0.0721 | 21  | 57.87 | 10.90 | 9.00 | 0.0026 | 0.4060 |

|                                           |     |     |        |       |       |        |        |     |       |       |       |        |        |
|-------------------------------------------|-----|-----|--------|-------|-------|--------|--------|-----|-------|-------|-------|--------|--------|
| Cholera - Infection                       | 82  | 65  | 21.19  | 5.54  | 2.79  | 0.0008 | 0.0764 | 57  | 39.40 | 8.55  | 6.21  | 0.0031 | 0.4590 |
| Wnt signaling pathway                     | 261 | 219 | 53.40  | 12.43 | 6.73  | 0.0008 | 0.0764 | 121 | 43.13 | 11.20 | 7.55  | 0.0049 | 0.6382 |
| Gap junction                              | 206 | 160 | 49.96  | 12.13 | 6.50  | 0.0008 | 0.0771 | 93  | 61.41 | 11.06 | 8.46  | 0.0013 | 0.2365 |
| Cyanoamino acid metabolism                | 14  | 11  | 18.42  | 3.53  | 2.53  | 0.0008 | 0.0775 | 8   | 25.30 | 7.48  | 6.41  | 0.0233 | 1.0000 |
| SNARE interactions in vesicular transport | 64  | 64  | 35.79  | 7.77  | 4.50  | 0.0008 | 0.0775 | 32  | 35.50 | 9.09  | 6.37  | 0.0060 | 0.6990 |
| Nitrogen metabolism                       | 39  | 31  | 42.00  | 10.13 | 5.60  | 0.0008 | 0.0784 | 10  | 60.02 | 16.60 | 15.23 | 0.0224 | 1.0000 |
| Antigen processing and presentation       | 164 | 111 | 80.04  | 11.95 | 9.80  | 0.0008 | 0.0786 | 68  | 29.28 | 9.96  | 6.00  | 0.0115 | 0.9450 |
| Glycine, serine and threonine metabolism  | 56  | 42  | 54.90  | 13.02 | 7.44  | 0.0008 | 0.0786 | 24  | 45.97 | 11.71 | 7.74  | 0.0036 | 0.5115 |
| Glycan structures - degradation           | 51  | 38  | 34.08  | 7.57  | 4.64  | 0.0009 | 0.0825 | 19  | 20.62 | 9.29  | 7.16  | 0.0746 | 1.0000 |
| Phosphatidylinositol signaling system     | 136 | 113 | 44.86  | 10.79 | 5.86  | 0.0009 | 0.0828 | 51  | 37.85 | 10.09 | 6.95  | 0.0067 | 0.7546 |
| Starch and sucrose metabolism             | 90  | 70  | 48.01  | 11.86 | 6.58  | 0.0010 | 0.0874 | 41  | 27.35 | 8.19  | 5.87  | 0.0146 | 1.0000 |
| One carbon pool by folate                 | 28  | 24  | 23.60  | 4.63  | 3.06  | 0.0010 | 0.0886 | 14  | 31.66 | 7.48  | 5.61  | 0.0046 | 0.6026 |
| gamma-Hexachlorocyclohexane degradation   | 39  | 23  | 71.24  | 14.34 | 9.56  | 0.0010 | 0.0899 | 13  | 35.32 | 11.83 | 8.14  | 0.0183 | 1.0000 |
| Limonene and pinene degradation           | 58  | 43  | 59.25  | 12.56 | 7.92  | 0.0010 | 0.0899 | 29  | 35.26 | 8.57  | 5.76  | 0.0035 | 0.4937 |
| Type I diabetes mellitus                  | 98  | 68  | 116.46 | 20.54 | 15.05 | 0.0010 | 0.0899 | 21  | 24.88 | 9.22  | 5.53  | 0.0179 | 1.0000 |
| Bile acid biosynthesis                    | 50  | 35  | 50.46  | 10.82 | 6.70  | 0.0011 | 0.0927 | 22  | 18.01 | 9.22  | 6.34  | 0.0880 | 1.0000 |
| DNA polymerase                            | 31  | 28  | 24.26  | 4.76  | 3.09  | 0.0011 | 0.0927 | 21  | 28.17 | 9.65  | 7.74  | 0.0332 | 1.0000 |
| Pentose phosphate pathway                 | 42  | 31  | 25.75  | 6.72  | 3.53  | 0.0011 | 0.0927 | 22  | 44.82 | 10.05 | 8.76  | 0.0083 | 0.8481 |
| Benzoate degradation via hydroxylation    | 8   | 6   | 30.40  | 5.07  | 4.23  | 0.0012 | 0.0965 | 6   | 2.00  | 4.79  | 4.13  | 0.7195 | 1.0000 |
| Bisphenol A degradation                   | 18  | 14  | 112.46 | 22.37 | 15.85 | 0.0013 | 0.1015 | 9   | 37.73 | 15.04 | 11.03 | 0.0444 | 1.0000 |
| Urea cycle and metabolism of amino groups | 30  | 26  | 89.59  | 20.21 | 12.54 | 0.0013 | 0.1067 | 14  | 93.30 | 15.66 | 13.34 | 0.0017 | 0.2945 |
| 1- and 2-Methylnaphthalene degradation    | 38  | 25  | 60.83  | 11.49 | 8.30  | 0.0014 | 0.1072 | 18  | 35.22 | 9.99  | 7.10  | 0.0096 | 0.8805 |
| Heparan sulfate biosynthesis              | 26  | 23  | 36.36  | 7.88  | 5.14  | 0.0014 | 0.1072 | 13  | 29.25 | 9.93  | 8.15  | 0.0340 | 1.0000 |
| PPAR signaling pathway                    | 118 | 88  | 47.26  | 13.95 | 6.75  | 0.0014 | 0.1072 | 34  | 66.64 | 11.44 | 8.81  | 0.0012 | 0.2179 |
| Glycan structures - biosynthesis 2        | 99  | 84  | 24.19  | 7.19  | 3.49  | 0.0014 | 0.1082 | 28  | 18.41 | 8.33  | 5.31  | 0.0525 | 1.0000 |
| Nucleotide sugars metabolism              | 17  | 16  | 42.92  | 8.30  | 5.83  | 0.0014 | 0.1082 | 11  | 24.77 | 11.05 | 7.95  | 0.0629 | 1.0000 |
| Glycolysis / Gluconeogenesis              | 102 | 64  | 35.59  | 9.36  | 4.96  | 0.0015 | 0.1088 | 50  | 41.35 | 8.93  | 6.73  | 0.0032 | 0.4666 |
| Neuroactive ligand-receptor interaction   | 418 | 237 | 43.06  | 11.50 | 5.81  | 0.0015 | 0.1131 | 41  | 36.52 | 8.90  | 6.40  | 0.0057 | 0.6958 |
| Calcium signaling pathway                 | 332 | 246 | 40.88  | 10.62 | 5.59  | 0.0016 | 0.1144 | 90  | 52.62 | 10.83 | 7.55  | 0.0017 | 0.2945 |
| Ubiquinone biosynthesis                   | 8   | 8   | 14.21  | 3.04  | 2.13  | 0.0017 | 0.1188 | 6   | 21.89 | 4.40  | 3.56  | 0.0031 | 0.4650 |
| Sulfur metabolism                         | 19  | 16  | 90.30  | 14.98 | 12.72 | 0.0017 | 0.1207 | 8   | 12.37 | 7.63  | 7.92  | 0.1777 | 1.0000 |
| Type II diabetes mellitus                 | 78  | 50  | 30.01  | 8.14  | 4.49  | 0.0018 | 0.1215 | 11  | 33.62 | 9.80  | 6.82  | 0.0092 | 0.8805 |
| B cell receptor signaling pathway         | 114 | 97  | 47.48  | 11.90 | 6.88  | 0.0018 | 0.1246 | 40  | 42.57 | 11.38 | 8.30  | 0.0091 | 0.8803 |
| Arachidonic acid metabolism               | 86  | 52  | 40.67  | 10.74 | 6.00  | 0.0019 | 0.1254 | 18  | 48.84 | 10.09 | 8.03  | 0.0035 | 0.4937 |

|                                                |     |     |        |       |       |        |        |    |        |       |       |        |        |
|------------------------------------------------|-----|-----|--------|-------|-------|--------|--------|----|--------|-------|-------|--------|--------|
| Ethylbenzene degradation                       | 28  | 23  | 63.04  | 12.72 | 9.12  | 0.0019 | 0.1259 | 15 | 39.35  | 9.40  | 6.82  | 0.0045 | 0.5911 |
| Phenylalanine metabolism                       | 49  | 33  | 73.44  | 14.55 | 10.92 | 0.0020 | 0.1277 | 19 | 30.39  | 7.52  | 5.42  | 0.0057 | 0.6958 |
| Inositol phosphate metabolism                  | 81  | 68  | 35.03  | 9.60  | 5.15  | 0.0020 | 0.1293 | 32 | 24.00  | 8.85  | 6.18  | 0.0302 | 1.0000 |
| Linoleic acid metabolism                       | 61  | 32  | 29.78  | 7.81  | 4.67  | 0.0020 | 0.1293 | 14 | 56.66  | 11.09 | 8.69  | 0.0025 | 0.3883 |
| Folate biosynthesis                            | 56  | 50  | 25.34  | 6.80  | 3.90  | 0.0026 | 0.1604 | 35 | 15.93  | 6.58  | 4.11  | 0.0345 | 1.0000 |
| Long-term potentiation                         | 142 | 110 | 40.53  | 9.65  | 6.05  | 0.0028 | 0.1698 | 51 | 44.43  | 10.06 | 7.44  | 0.0040 | 0.5438 |
| Pyruvate metabolism                            | 63  | 52  | 37.54  | 10.91 | 5.87  | 0.0028 | 0.1698 | 37 | 33.82  | 8.51  | 6.14  | 0.0057 | 0.6958 |
| Synthesis and degradation of ketone bodies     | 11  | 10  | 35.55  | 8.19  | 5.72  | 0.0029 | 0.1698 | 9  | 83.47  | 16.00 | 13.28 | 0.0024 | 0.3762 |
| Glyoxylate and dicarboxylate metabolism        | 15  | 12  | 21.46  | 4.54  | 3.39  | 0.0032 | 0.1834 | 12 | 15.09  | 5.09  | 3.84  | 0.0258 | 1.0000 |
| Fructose and mannose metabolism                | 63  | 50  | 21.96  | 7.10  | 3.53  | 0.0033 | 0.1909 | 31 | 33.90  | 8.61  | 5.79  | 0.0044 | 0.5877 |
| Nitrobenzene degradation                       | 20  | 14  | 8.73   | 2.75  | 1.47  | 0.0039 | 0.2169 | 9  | 21.31  | 6.08  | 4.30  | 0.0092 | 0.8805 |
| T cell receptor signaling pathway              | 168 | 128 | 20.54  | 7.06  | 3.27  | 0.0039 | 0.2169 | 56 | 36.77  | 10.89 | 8.00  | 0.0148 | 1.0000 |
| Metabolism of xenobiotics by cytochrome P450   | 95  | 52  | 79.49  | 20.21 | 13.25 | 0.0042 | 0.2268 | 21 | 21.54  | 8.29  | 5.12  | 0.0239 | 1.0000 |
| Histidine metabolism                           | 59  | 47  | 52.36  | 13.77 | 8.80  | 0.0046 | 0.2412 | 22 | 26.85  | 7.18  | 4.76  | 0.0052 | 0.6619 |
| Peptidoglycan biosynthesis                     | 4   | 4   | 104.97 | 13.04 | 18.21 | 0.0046 | 0.2412 | 3  | 49.73  | 20.08 | 22.35 | 0.0905 | 1.0000 |
| Ascorbate and aldarate metabolism              | 19  | 17  | 69.33  | 16.28 | 12.07 | 0.0048 | 0.2439 | 12 | 27.49  | 10.08 | 7.18  | 0.0299 | 1.0000 |
| Glycosphingolipid biosynthesis - ganglioseries | 21  | 17  | 23.65  | 7.20  | 4.15  | 0.0049 | 0.2439 | 6  | 16.66  | 9.34  | 8.39  | 0.1420 | 1.0000 |
| Alzheimer's disease                            | 45  | 37  | 62.12  | 17.34 | 10.93 | 0.0054 | 0.2634 | 26 | 18.81  | 12.23 | 7.86  | 0.1657 | 1.0000 |
| Protein export                                 | 15  | 13  | 9.11   | 2.70  | 1.66  | 0.0054 | 0.2634 | 13 | 39.28  | 9.47  | 7.48  | 0.0079 | 0.8259 |
| Fatty acid biosynthesis                        | 11  | 9   | 43.40  | 7.82  | 7.78  | 0.0057 | 0.2664 | 4  | 216.63 | 26.13 | 30.54 | 0.0016 | 0.2833 |
| Aminophosphonate metabolism                    | 26  | 21  | 8.08   | 3.06  | 1.44  | 0.0066 | 0.3058 | 12 | 19.02  | 6.43  | 4.00  | 0.0126 | 1.0000 |
| Biotin metabolism                              | 13  | 12  | 10.81  | 3.12  | 2.02  | 0.0068 | 0.3058 | 5  | 54.40  | 14.23 | 16.64 | 0.0352 | 1.0000 |
| N-Glycan biosynthesis                          | 58  | 50  | 18.82  | 6.01  | 3.37  | 0.0068 | 0.3058 | 36 | 32.52  | 8.84  | 6.44  | 0.0092 | 0.8805 |
| Long-term depression                           | 148 | 111 | 34.04  | 10.55 | 6.06  | 0.0071 | 0.3072 | 48 | 37.93  | 9.53  | 6.70  | 0.0054 | 0.6843 |
| Notch signaling pathway                        | 79  | 69  | 23.19  | 7.75  | 4.26  | 0.0075 | 0.3146 | 50 | 20.43  | 8.34  | 5.96  | 0.0459 | 1.0000 |
| Porphyrin and chlorophyll metabolism           | 43  | 34  | 51.69  | 12.23 | 9.63  | 0.0077 | 0.3146 | 19 | 20.94  | 7.32  | 5.24  | 0.0261 | 1.0000 |
| Valine, leucine and isoleucine biosynthesis    | 16  | 15  | 37.05  | 7.62  | 7.26  | 0.0089 | 0.3544 | 10 | 10.45  | 6.24  | 5.01  | 0.1496 | 1.0000 |
| Diterpenoid biosynthesis                       | 3   | 3   | 53.19  | 10.79 | 11.21 | 0.0106 | 0.4135 | 1  | 3.93   | 7.04  | 9.96  | 0.4553 | 1.0000 |
| Aminoacyl-tRNA biosynthesis                    | 40  | 38  | 10.84  | 4.18  | 2.08  | 0.0111 | 0.4220 | 33 | 64.61  | 11.35 | 9.44  | 0.0020 | 0.3297 |
| Chondroitin sulfate biosynthesis               | 21  | 20  | 32.66  | 10.43 | 6.64  | 0.0117 | 0.4332 | 12 | 32.07  | 8.81  | 7.86  | 0.0210 | 1.0000 |
| Proteasome                                     | 48  | 29  | 6.22   | 2.53  | 1.24  | 0.0142 | 0.5115 | 45 | 32.19  | 7.40  | 5.86  | 0.0056 | 0.6916 |
| Retinol metabolism                             | 5   | 5   | 100.63 | 21.53 | 23.67 | 0.0157 | 0.5487 | 1  | 4.32   | 7.61  | 10.76 | 0.4512 | 1.0000 |
| Caprolactam degradation                        | 26  | 25  | 12.75  | 4.93  | 2.71  | 0.0171 | 0.5765 | 14 | 12.40  | 6.18  | 4.20  | 0.0809 | 1.0000 |

|                                                                 |     |    |        |       |       |        |        |     |         |        |        |        |        |
|-----------------------------------------------------------------|-----|----|--------|-------|-------|--------|--------|-----|---------|--------|--------|--------|--------|
| N-Glycan degradation                                            | 20  | 17 | 29.27  | 8.57  | 6.65  | 0.0170 | 0.5765 | 8   | 12.89   | 8.67   | 7.18   | 0.1956 | 1.0000 |
| Novobiocin biosynthesis                                         | 4   | 2  | 16.22  | 3.91  | 3.98  | 0.0171 | 0.5765 | 2   | 54.00   | 10.25  | 13.06  | 0.0164 | 1.0000 |
| Phenylalanine, tyrosine and tryptophan biosynthesis             | 18  | 13 | 35.87  | 9.78  | 8.31  | 0.0175 | 0.5765 | 10  | 63.66   | 12.59  | 9.97   | 0.0024 | 0.3701 |
| Amyotrophic lateral sclerosis (ALS)                             | 34  | 28 | 73.95  | 24.39 | 18.89 | 0.0266 | 0.7980 | 16  | 39.63   | 10.47  | 7.73   | 0.0082 | 0.8419 |
| Androgen and estrogen metabolism                                | 62  | 42 | 30.43  | 10.89 | 7.52  | 0.0280 | 0.8129 | 11  | 19.95   | 5.96   | 3.98   | 0.0087 | 0.8747 |
| Pentose and glucuronate interconversions                        | 21  | 15 | 67.73  | 18.38 | 18.63 | 0.0284 | 0.8129 | 7   | 22.83   | 6.22   | 5.20   | 0.0149 | 1.0000 |
| Streptomycin biosynthesis                                       | 12  | 11 | 33.09  | 12.55 | 8.44  | 0.0301 | 0.8129 | 6   | 44.94   | 9.23   | 8.10   | 0.0058 | 0.6958 |
| Alkaloid biosynthesis I                                         | 7   | 5  | 164.60 | 40.45 | 48.96 | 0.0318 | 0.8199 | 2   | 54.00   | 10.25  | 13.06  | 0.0164 | 1.0000 |
| Alkaloid biosynthesis II                                        | 33  | 26 | 28.46  | 10.32 | 7.53  | 0.0329 | 0.8199 | 17  | 25.28   | 6.61   | 4.64   | 0.0062 | 0.7122 |
| Tetrachloroethene degradation                                   | 7   | 6  | 37.77  | 10.27 | 10.88 | 0.0315 | 0.8199 | 4   | 13.78   | 13.88  | 11.37  | 0.3867 | 1.0000 |
| Glycosphingolipid biosynthesis - globoseries                    | 21  | 15 | 24.27  | 9.26  | 7.12  | 0.0430 | 0.9261 | 7   | 17.15   | 8.07   | 6.55   | 0.0879 | 1.0000 |
| Regulation of autophagy                                         | 40  | 24 | 15.18  | 5.99  | 4.29  | 0.0415 | 0.9261 | 12  | 40.34   | 11.30  | 9.77   | 0.0201 | 1.0000 |
| Ribosome                                                        | 201 | 48 | 22.00  | 8.01  | 6.34  | 0.0403 | 0.9261 | 163 | 39.46   | 8.01   | 8.07   | 0.0103 | 0.9094 |
| 1,1,1-Trichloro-2,2-bis(4-chlorophenyl)ethane (DDT) degradation | 3   | 1  | 27.59  | 16.44 | 23.25 | 0.1951 | 1      | 1   | 1441.12 | 128.38 | 181.56 | 0.0008 | 0.1468 |
| 2,4-Dichlorobenzoate degradation                                | 7   | 5  | 1.76   | 5.11  | 4.33  | 0.7870 | 1      | 4   | 17.03   | 2.66   | 2.72   | 0.0028 | 0.4156 |
| C21-Steroid hormone metabolism                                  | 12  | 6  | 28.63  | 13.76 | 10.95 | 0.0954 | 1      | 0   | NA      | NA     | NA     | NA     | NA     |
| C5-Branched dibasic acid metabolism                             | 3   | 3  | 0.38   | 2.70  | 2.74  | 0.8668 | 1      | 3   | 17.40   | 13.25  | 14.91  | 0.2507 | 1.0000 |
| Carbon fixation                                                 | 42  | 24 | 18.55  | 8.80  | 6.32  | 0.0732 | 1      | 19  | 48.39   | 10.23  | 10.02  | 0.0109 | 0.9268 |
| D-Glutamine and D-glutamate metabolism                          | 9   | 9  | 6.85   | 3.92  | 3.47  | 0.1446 | 1      | 3   | 14.09   | 5.65   | 5.34   | 0.0702 | 1.0000 |
| Fluorene degradation                                            | 3   | 1  | 11.09  | 5.96  | 8.43  | 0.1725 | 1      | 1   | 0.26    | 0.96   | 1.35   | 0.5995 | 1.0000 |
| Glycosphingolipid biosynthesis - lactoseries                    | 14  | 9  | 15.35  | 7.08  | 6.71  | 0.1020 | 1      | 3   | 6.99    | 6.54   | 6.91   | 0.3173 | 1.0000 |
| Glycosphingolipid biosynthesis - neolactoseries                 | 39  | 30 | 15.64  | 6.49  | 4.97  | 0.0556 | 1      | 11  | 10.39   | 6.38   | 4.11   | 0.1435 | 1.0000 |
| Inositol metabolism                                             | 7   | 5  | 2.17   | 9.34  | 12.32 | 0.6841 | 1      | 5   | 174.46  | 20.25  | 24.31  | 0.0015 | 0.2711 |
| Lysine biosynthesis                                             | 6   | 5  | 15.25  | 6.48  | 6.94  | 0.0951 | 1      | 4   | 14.06   | 10.04  | 10.97  | 0.2285 | 1.0000 |
| Maturity onset diabetes of the young                            | 38  | 19 | 42.63  | 16.52 | 13.90 | 0.0539 | 1      | 4   | 5.22    | 7.18   | 7.73   | 0.4537 | 1.0000 |
| Methane metabolism                                              | 18  | 11 | 9.49   | 4.26  | 3.08  | 0.0641 | 1      | 8   | 13.88   | 7.58   | 6.90   | 0.1349 | 1.0000 |
| Pantothenate and CoA biosynthesis                               | 31  | 27 | 30.34  | 14.07 | 9.64  | 0.0646 | 1      | 12  | 9.40    | 7.83   | 6.11   | 0.2848 | 1.0000 |
| Riboflavin metabolism                                           | 25  | 22 | 20.64  | 13.72 | 10.88 | 0.1777 | 1      | 14  | 20.57   | 9.60   | 6.00   | 0.0561 | 1.0000 |
| Stilbene, coumarine and lignin biosynthesis                     | 12  | 7  | 13.58  | 6.20  | 5.73  | 0.0953 | 1      | 4   | 33.20   | 8.01   | 8.57   | 0.0219 | 1.0000 |
| Thiamine metabolism                                             | 10  | 9  | 11.30  | 5.14  | 3.65  | 0.0660 | 1      | 5   | 6.84    | 6.66   | 6.14   | 0.3449 | 1.0000 |
| Carbazole degradation                                           | 2   | 0  | NA     | NA    | NA    | NA     | NA     | 0   | NA      | NA     | NA     | NA     | NA     |
| D-Arginine and D-ornithine metabolism                           | 1   | 0  | NA     | NA    | NA    | NA     | NA     | 0   | NA      | NA     | NA     | NA     | NA     |

|                            |   |   |    |    |    |    |    |   |    |    |    |    |    |
|----------------------------|---|---|----|----|----|----|----|---|----|----|----|----|----|
| Monoterpenoid biosynthesis | 8 | 0 | NA | NA | NA | NA | NA | 0 | NA | NA | NA | NA | NA |
|----------------------------|---|---|----|----|----|----|----|---|----|----|----|----|----|

1. Number of genes associated with the specified pathway.
2. Number of genes tested by this dataset that are associated with the specified pathway
3. FWER: Multiplicity-adjusted p value by Holm's method
